# Supplementary material for: Protein Phosphatase 1 inactivates Mps1 to ensure efficient Spindle Assembly Checkpoint silencing
Source: eLife. 2017 May 2;6:e25366. doi: 10.7554/eLife.25366 (PMC5433843; doi:10.7554/eLife.25366)
Supplement: Figure 1—source data 1. — DOI: http://dx.doi.org/10.7554/eLife.25366.003 [file elife-25366-fig1-data1.xlsx]

## Sheet: Source data Figure 1
Figure 1 A,B	CONTROL (Mean GFP-Mad1 KT region-Mean GFP-Mad1 cytoplasm)																							Figure 1 A,B	PP1-87B RNAi (Mean GFP-Mad1 KT region-Mean GFP-Mad1 cytoplasm)										Figure 1 A,B	PP1-87B + Mps1 RNAi (Mean GFP-Mad1 KT region-Mean GFP-Mad1 cytoplasm)												Figure 1C,D	Control
Time (min)	cell1	2	3	4	5	6	7	8	9	10	11	12	13	14	15	16	17	18	19	20	21	22		Time (min)	cell1	2	3	4	5	6	7	8	9		Time (min)	cell1	2	3	4	5	6	7	8	9	10	11		InterKT distance (um)	pAurB/CID
0	4.32243	3.61321	3.49947	6.51979	5.09833	3.31908	4.86738	2.1125	4.94895	5.454	3.0746	5.64143	6.78305	5.4405	4.17542	5.57367	5.78535	5.15708	4.3845	5.5264	5.14127	3.14333		0	4.1486	3.06048	4.91462	2.68694	3.66952	4.84303	5.98605	4.08665	5.24719		0	2.07805	1.52023	0.953037	2.96108	1.55764	0.591737	0.510056	0.778818	0.683258	0.497665	0.856052		1.33	0.435117
2	4.18543	4.42621	3.11947	4.03179	2.80433	2.81008	3.52738	1.1275	3.27595	4.279	3.2256	5.59943	4.59405	5.6385	3.95842	4.26867	4.50435	2.89608	4.7725	3.6114	4.39427	2.88333		2	3.6686	2.92248	3.31862	2.51594	1.82152	4.02703	4.90805	2.57565	3.84819		0.5	1.74416				1.1718	0.44516	0.383712	0.585899	0.658708	0.476505	0.799588
4	3.19543	2.77421	2.76547	3.68079	1.85933	2.47008	3.31538	0.8045	2.34995	3.094	2.7526	4.21543	4.31905	4.9905	3.86342	3.74667	3.92335	2.26808	4.0805	3.9984	4.25427	2.47733		4	3.4206	3.19448	2.57562	2.44694	2.40752	3.57003	3.52905	2.63165	3.54919		1	1.44057	0.977291	0.464741	2.53638	0.893582	0.339467	0.292608	0.446791	0.663676	0.473031	0.759694		0.82	0.55311
6	2.71443	2.18321	1.94647	3.28179	2.04033	2.02908	3.13738	1.2375	2.92295	2.675	2.9526	3.31743	3.89105	5.1985	3.27342	2.75167	3.41035	1.14608	3.2325	3.9624	4.13727	2.83633		6	3.1486	2.96948	2.25762	3.00394	2.19952	3.72103	3.62805	2.26665	3.04119		1.5	1.1887				0.73639	0.27975	0.241135	0.368195	0.656397	0.42783	0.749409
8	2.72643	0.765214	1.86447	3.12779	2.04933	1.79408	2.57438	0.5885	2.15795	2.106	1.9386	2.91043	3.57105	4.1425	2.30542	2.29467	3.03235	1.05608	2.7105	3.8964	3.40927	2.08833		8	2.6756	3.08548	2.06662	3.24494	2.00952	4.26903	3.37005	2.39865	3.17219		2	0.894558	0.922849	0.958219	1.03065	0.614733	0.233534	0.201298	0.307366	0.644035	0.395929	0.744994		1.13	0.649241
10	2.34243	1.84321	1.86147	2.13279	0.378333	1.24308	1.91038	0.2575	1.85395	1.809	2.4106	2.20843	3.19605	3.5985	1.49742	1.97467	2.92735	0.698083	2.0845	3.7534	3.33127	1.67233		10	2.6776	3.04448	2.08762	3.10194	2.49352	4.32503	3.76505	2.08265	2.70219		2.5	0.783214				0.696554	0.264617	0.22809	0.348277	0.635948	0.399906	0.677154
12	2.29743	1.58521	2.05647	1.61379	1.18433	1.26408	2.36138	0.3945	1.49795	1.7	2.1336	2.02043	2.74005	3.0725	1.72942	1.79167	2.67635	0.613083	1.7405	3.5654	2.84227	1.51333		12	2.8456	3.25648	2.06962	2.88694	2.42952	4.33503	3.44005	2.41065	3.12619		3	0.681172	0.614838	0.39384	0.571992	0.64736	0.245928	0.211981	0.32368	0.695967	0.358635	0.684634		0.75	0.613695
14	1.66243	0.391214	0.816474	1.60279	0.0383333	0.912083	1.80838	0.1765	1.62695	1.068	1.5646	2.22943	1.97605	2.9235	1.46542	1.37167	2.44235	0.361083	1.1255	3.1474	3.10327	1.79333		14	3.4496	3.23048	1.59962	3.10994	2.12752	4.34203	3.73205	2.48965	3.16319		3.5	0.622399				0.685425	0.260389	0.224446	0.342713	0.618849	0.35274	0.689049
16	1.76743	1.32321	1.00247	1.18779	0.291333	1.04908	1.45038		1.58495	0.907	1.7416	1.53943	1.73105	2.3105	1.21442	1.35467	2.48235	0.446083	1.5065	3.0014	2.77827	1.55733		16	3.1946	2.71348	1.58762	3.29394	2.22852	4.23203	2.88605	2.25065	2.86919		4	0.571801	0.500925	0.214351	1.14704	0.665697	0.252895	0.217986	0.332848	0.621911	0.347941	0.651441		1.14	0.659272
18	2.04043	0.671214	0.767474	0.936786	0	0.514083	1.50238		1.55095	0.811	1.2036	1.62743	1.94505	2.0425	0.992417	1.30067	2.30435	0.218083	1.2335	2.8604	2.61727	1.64933		18	3.5136	3.33648	1.61462	3.45794	1.84852	4.45103	3.26705	2.05865	3.28219		4.5	0.445658				0.681505	0.2589	0.223162	0.340752	0.582283	0.31252	0.600067
20	1.40743	0.864214	0.804474	1.04479	0	0.717083	1.67538		1.39695	0.374	1.3076	1.46743	2.42005	1.8855	1.12042	1.19167	2.40235	0.106083	0.9275	2.6964	1.88027	1.83133		20	3.0376	3.00348	1.17562	3.68394	1.84152	3.87903	3.47305	2.04065	2.56819		5	0.295978	0.495895	0.233195	0.00152633	0.757256	0.287677	0.247967	0.378628	0.584594	0.329796	0.527085		0.97	0.30905
22	1.28343	0.284214	0.479474	0.967786	0	0.477083	1.38838		1.53695	0.576	0.5506	1.42243	1.45105	1.6045	1.48642	0.934667	2.28035	0.0170833	0.9395	2.6484	1.83327	1.43233		22	3.0306	2.87648	1.51262	3.71394	1.82252	3.62303	3.05905	1.70165	3.02619		5.5	0.218319				0.663041	0.251886	0.217116	0.331521	0.563682	0.320519	0.473841
24	1.44943	0.292214	0.446474	0.667786	0		1.21538		1.20195		0.6086	0.819429	1.67005	1.5375		1.04367	2.45835			2.4054	1.81027	2.53233		24	2.9966	3.09648	1.65962	3.74694	1.86352	4.15203	3.10505	2.23765	3.07719		6	0.112472	0.255936	0.119189	0	0.712235	0.270574	0.233225	0.356118	0.4991	0.329477	0.469374		1.3	0.502854
26	1.06243	0.453214	0	0.545786	0				1.38795		0.5426	0.384429	1.99405	1.8995		0.804667	1.95535			2.0834	1.54527	1.27133		26	3.3426	3.23048	1.53162	3.68994	2.08452	3.77703	3.11305	2.00065	3.01019		6.5	0.0631419				0.777237	0.295268	0.25451	0.388618	0.471199	0.273992	0.400703
28			0		0				1.35295		0.6946		1.46305	1.1475		0.899667	2.23135			2.2334	1.83027	1.81933		28	3.3706	2.89148	1.70062	3.91694	1.74752	3.41503	3.23505	2.22865	2.80919		7	0.0618735	0.502996	0.43883	0.0629611	0.906481	0.344367	0.296832	0.453241	0.443355	0.257813	0.386314		1.17	0.540884
30			0						1.10195				1.60005	1.0955			2.08635			2.1074				30	3.1316	2.57448	1.47462	3.69894	2.22052	3.57803	3.07205	2.12265	3.22819		7.5	0.0978136				0.733481	0.278645	0.240182	0.36674	0.31679	0.242274	0.250374
32			0						1.21295				1.19605	1.3075			1.97435			1.9604				32	3.1486	3.23048	1.44362	4.07194	2.09252	3.51703	3.29205	2.48965	2.91919		8	0.270045	0.0405355	0.279363	0	0.787607	0.299207	0.257906	0.393803	0.323433	0.200136	0.339148		1.32	0.560629
34			0						0.93395				1.04505	1.6475						1.6444				34	3.1866	2.91948	1.59962	3.91694	2.19752	3.27703	3.09505	1.64965	3.02019		8.5	0.179419				0.740563	0.281336	0.242501	0.370281	0.261219	0.179569	0.301904
36			0						0.63295				0.867053	1.5235						1.7034				36	2.7016	2.78748	1.61262	4.08894	1.71752	4.09103	2.73305	2.13665	3.02419		9	0.137418	0.355056	0.130024	0	0.47651	0.181023	0.156036	0.238255	0.244178	0.205117	0.294424		1.03	0.772097
38									0.51695					1.4295						1.6934				38	3.2186	3.32148	1.46462	4.25094	1.87752	3.68803	2.87205	2.29565	3.16519		9.5	0.150385				0.548087	0.208215	0.179474	0.274044	0.24643	0.205117	0.251933
40														1.1635										40	3.2336	2.79348	1.32062	3.75694	1.94052	3.55803	2.60544	2.28065	3.11119		10	0.160392	0.0109476	0.0718429	0	0.523933	0.199039	0.171565	0.261966	0.175032	0.16467	0.243622		1.13	0.675838
42														1.1685										42	3.0346	2.96548	1.58062	3.66594	2.26452	3.21503	2.52144	2.37265	2.73319		10.5	0.0962633				0.521024	0.197934	0.170612	0.260512	0.158799	0.104615	0.258945
44														1.0635										44	3.3646	2.66348	1.23662	3.33894	1.85152	2.56603	2.69244	1.98765	2.89219		11	0.123606	0.348251	0.0845626	0	0.48435	0.184002	0.158603	0.242175	0.113799	0.144926	0.291151		1.05	0.63419
46														1.0285										46	3.1966	2.89048	1.02762	3.01994	2.12552	3.14603	2.67444	1.99065	2.85719		11.5	0.187312				0.521783	0.198222	0.170861	0.260892	0.0906929	0.112293	0.294735
48														0.7175										48	3.3386	2.85348	1.27662	3.46994	2.58252	4.04403	2.48244	2.06665	3.09319		12	0.0883705	0	0	0	0.573	0.21768	0.187632	0.2865	0.0603079	0.133043	0.269023		1.27	0.777439
50														0.3605										50	3.0576	3.33248	1.37062	3.79694	2.19752	4.50103	2.71844	1.79365	2.77019		12.5	0.188157				0.464369	0.176411	0.15206	0.232185	0.0257637	0.141544	0.262218
52														0.2315										52	3.2206	2.92548	1.53362	3.52094	2.18752	4.76903	2.44044	2.13665	3.06419		13	0.0349536	0.249723		0	0.551122	0.209368	0.180468	0.275561	0.0773489	0.123948	0.2711		1.43	0.507449
54														0.3755										54	3.1216	2.82848	1.25862	3.65394	2.26052	4.59203	2.60944	1.79265	2.89419		13.5	0.123465				0.532153	0.202162	0.174256	0.266076	0.0268613	0.0985824	0.22996
frame of Anaphase Onset																								56	3.6116	2.82948	1.64962	3.26994	2.05852	4.59203	2.43944	1.41365	3.28019		14	0.0692024	0		0	0.488271	0.185491	0.159887	0.244135	0.0184274	0.0967086	0.271152		0.96	0.524076
																								58	3.1606	3.09548	1.28962	3.32594	2.28952	4.56603	2.81644	1.41665	3.41819		14.5	0.0197319				0.460449	0.174922	0.150776	0.230224	0	0.127558	0.268347
																								60	3.4786	3.10148	1.67862	3.76994	2.32952	4.65903	2.72844	1.90865	3.46119		15	0.0131076			0.535742	0.481568	0.182945	0.157692	0.240784		0.104524	0.198741		0.88	0.371498
																								62	3.6796	2.75948	1.58162	3.95594	1.93852	4.34403	2.67744	1.94065	3.21119		15.5	0.00408731				0.406197	0.154312	0.133011	0.203098		0.095109	0.145394
																								64	3.2016	2.96048	1.74462	3.97194	2.01052	4.45503	2.31944	1.50865	3.08219		16	0			0.681506	0.489156	0.185828	0.160177	0.244578		0.0445152			1.45	0.43993
																								66	2.9956	3.01448	1.77062	4.12994	2.14288	4.47603	2.73544	1.56565	3.05019		16.5	0				0.448435	0.170358	0.146842	0.224217		0.0452007
																								68	3.2066	3.23648	1.79562	3.58494	2.37588	4.67303	2.00844	2.09065	2.69719		17	0			0.331977	0.353588	0.134326	0.115784	0.176794		0.0398534			1.28	0.375021
																								70	3.3836	3.08548	1.83162	3.65594	2.32587	4.41403	2.32144	2.16465	3.21119		17.5	0				0.210307	0.0798943	0.068866	0.105153		0.0565352
																								72	3.5456	3.02548	1.94062	4.11094	2.33087	5.04903	2.58344	1.85265	3.32119		18	0			0.154922	0.327284	0.124333	0.107171	0.163642		0.0140767			1.24	0.504603
																								74	3.0016	3.05948	2.16462	4.07894	2.35487	4.74603	2.85744	2.19465	2.84619		18.5					0.207525	0.0788374	0.067955	0.103762
																								76	3.2376	3.09848	2.05662	3.96594	2.26187	5.08903	2.49344	2.40065	2.84319		19				0.496057	0.255707	0.0971415	0.0837325	0.127853					1.02	0.67057
																								78	3.3116	2.83348	2.01762	4.25894	1.74388	4.65003	2.70244	2.22665	2.87919		19.5					0.0863737	0.0328129	0.0282835	0.0431868
																								80	2.5376	2.83148	2.02562	3.66794	1.87187	4.87603	2.66544	2.41565	3.07419		20				0	0.0901676	0.0342541	0.0295258	0.0450838					0.77	0.624143
																								82	2.1536	2.90048	2.12262	3.78194	2.14087	4.67403	2.63844	2.18365	3.31119		20.5					0	0.03	0	0
																								84	2.8806	2.97048	2.15962	3.75694	2.13687	4.57903	2.57044	2.54565	2.80619		21						0							0.87	1.08619
																								86	2.9746	2.91948	2.34762	3.43294	1.98887	4.57203	2.69644	2.58565	3.17419		frame of Anaphase Onset
																								88	3.1666	2.89348	2.27862	3.72194	1.79787	4.64703	2.74244	2.90365	3.46219															0.83	0.738387
																								90	2.7876	2.78648	2.30362	3.57894	1.85187	4.68403		2.75165	3.33919
																								92	2.9996	2.77948	2.14562	3.71494	1.69788	4.81303		2.86965	3.23919															1.27	1.04106
																								94	2.7676	2.69348	2.79062	3.33894	1.63688	4.38703		2.54165	3.67419
																								96	2.5256	3.04048	2.49362	3.77094	1.26087	4.43303		2.71965	3.02319															1.06	0.873864
																								98	2.9246	2.79048	2.75762	3.61994		4.56003		2.37465	3.55719
																								100	2.5776	2.93748	2.70962	3.90394		4.19103		2.18865	3.37519															1.19	0.736536
																								102	3.0456	2.78748	2.63562	3.32294		4.32103		1.57965	3.22919
																								104	2.6246	2.81848	2.87762	3.30194		4.03903		1.34665	4.19019															0.78	0.840074
																								106	3.0406	3.00448	3.01362	3.47794		4.02903		1.27765	3.72119
																								108	3.2136	2.58848	3.14362	3.76094		3.59803		1.10065	4.63319															1.09	0.795745
																								110	2.6526	2.72648	3.18562	3.12894		4.13403		0.85065	4.07719
																								112	2.6526		3.15262	3.17794		3.78203		0.56665	3.93019															1.08	0.782378
																								114	3.0986		2.96862	2.98294		3.68003		0	3.52319
																								116	2.9846		2.58962	3.60094		3.93103		0.08365	3.77419															1.19	0.620219
																								118	3.2456		2.81562	3.20494		3.18803		0	3.76519
																								120	2.7426		3.04062	3.43694					3.80019															1.11	1.07378
																								122	2.7386		2.96962	3.25594					3.54919
																								124	2.5946		3.17762	3.50594					3.80419															0.98	0.712479
																								126	2.6386		3.11462	3.40794					3.78719
																								128	2.7366		3.07362	3.23694					3.66619															0.97	0.83377
																								130	2.8576		3.12562	3.63394					3.63319
																								132	2.9696		2.87662	3.55194					3.18719															1.52	0.586894
																								134	2.8746		2.74962	3.70494					3.72219
																								136	2.7066		2.68962	3.58794					3.85419															1.8	0.579111
																								138	3.0846		2.22962	3.92794					3.49819
																								140	3.1186		2.98762	3.87794					3.61119															1.51	0.660556
																								142	2.8036		2.67762	3.57894					3.89419
																								144	2.8416		2.75562	3.56994					3.69919															2.07	0.483624
																								146	2.7536		2.35762	3.71594					3.64419
																								148	2.5726		2.68462	3.61294					3.51219															1.45	0.786127
																								150	2.61908		2.67162	3.32594					3.79419
																								152	2.44408		2.61362	3.61594					3.49519															0.38	0.773107
																								154	2.65708		2.55362	3.67494					3.24719
																								156	2.77808		2.73262	3.30394					3.20119															0.47	0.664951
																								158	2.77108		2.40962	3.65194					3.40319
																								160	2.38808		2.53162	3.84394					3.14119															0.46	0.61376
																								162	2.65308		2.63162	3.77894					3.53119
																								164	2.70808		2.64362	3.33394					3.64419															0.42	0.640712
																								166	2.88008		2.36462	3.79594					3.52019
																								168	2.50408		2.29562	3.86394					3.52719															0.47	0.546108
																								170	2.37208		2.00162	3.42794					3.03319
																								172	2.71208		1.56762	3.40094					3.04219															0.56	0.693412
																								174	2.40708		1.42162	3.58494					3.27219
																								176	2.51608		1.59262	3.73594					2.93719															0.5	0.424168
																								178	2.44308		1.64862	3.54194					3.25619
																								180	2.69208		1.19162	3.55094					3.09219															0.46	0.68056
																								182	2.42908		1.25462	3.84794					2.98719
																								184	2.38508		1.27262	3.24894					3.06219															0.35	0.787128
																								186	2.61208		1.24662						3.47019
																								188	2.38708		1.15362						2.95119															0.54	0.577181
																								190	2.53908		0.956623						3.47319
																								192	2.39708		1.00362						3.37719															0.42	0.852501
																								194	2.74908		1.40662						3.24419
																								196	2.30008		1.12662						3.12419															0.52	0.754167
																								198	2.56808		1.50762						3.09619
																								200			1.73762						3.19619															0.42	0.643413
																								202			1.44962						3.21119
																								204			1.32462						2.72119															0.64	0.829941
																								206			1.13962						2.68019
																								208			1.69262						2.57319															0.43	1.05037
																								210			1.08962						2.82019
																								212			1.71462						2.82019															0.39	0.802539
																								214			1.55962						2.80719
																								216			1.60962						2.84519															0.53	0.877185
																								218			1.57362						2.51219
																								220			1.33862						2.95519															0.37	0.737813
																								222			1.25462						2.84219
																								224			1.92462						2.80419															0.31	2.17653
																								226			2.43662						2.49019
																								228			2.39362						3.09519															0.37	1.52315
																								230			2.46762						2.47119
																								232			2.51062						2.53719
																								234			2.54362						2.61519
																								236			2.66562						2.73019
																								238			2.21662						2.35319
																								240			2.21262						2.62219
																								242			2.20462						2.35819
																								244			2.29562						2.65919
																								246			2.12362						2.68519
																								248			2.23662						2.38119
																								250			2.26362						2.63519
																								252			2.22062						2.66219
																								254			1.98962						2.31019
																								256			2.13862						2.29019
																								258			1.64862						2.16319
																								260			2.08762						2.40119
																								262			1.97062						2.41519
																								264			1.90262						2.03619
																								266			2.13262						2.17419
																								268			1.76062						1.99019
																								270			1.96762						1.81719
																								272			2.48462						1.63719
																								274			2.45462						2.16719
																								276			2.00962						1.89919
																								278			1.73562						2.04219
																								280			2.38362						1.82819
																								282			1.54862						1.96519
																								284			2.25462						1.61119
																								286			1.45262						1.78819
																								288			1.49162						1.52219
																								290			1.52362						1.89919
																								292			1.56162						1.83119
																								294			1.43562						1.60519
																								296			1.30562
																								298			1.89862
																								300			1.60262
																								frame of Anaphase Onset









































[truncated: 40 more columns]
