# Supplementary material for: Protein Phosphatase 1 inactivates Mps1 to ensure efficient Spindle Assembly Checkpoint silencing
Source: eLife. 2017 May 2;6:e25366. doi: 10.7554/eLife.25366 (PMC5433843; doi:10.7554/eLife.25366)
Supplement: Figure 2—source data 1. — DOI: http://dx.doi.org/10.7554/eLife.25366.012 [file elife-25366-fig2-data1.xlsx]

## Sheet: Siurce data Figure 2
Figure 2A,B	PROMETAPHASE				Figure 2C,D	METAPHASE				Figure 2E,F	EGFP-Mps1 WT at unattached KTs (colchicine)										Figure 2E,F	EGFP-Mps1 WT at metaphase KTs													Figure 2E,F	EGFP-Mps1 WT at metaphase KTs PP1-87B RNAi
Mps1/CID	Mps1/CID	pMps1/CID	pMps1/CID		Mps1/CID	Mps1/CID	pMps1/CID	pMps1/CID		Time (sec)	Cell 1	2	3	4	5	6	7	8	9		Time (sec)	Cell1	2	3	4	5	6	7	8	9	10	11	12		Time (sec)	Cell1	2	3	4	5		7	8	9	10	11	12	13	14
Control	PP1-87B RNAi	Control	PP1-87B RNAi		Control	PP1-87B RNAi	Control	PP1-87B RNAi		0	0	0	0	0	0	0	0	0	0		0	0	0	0	0	0	0	0	0	0	0	0	0		0	0	0	0	0	0	0	0	0	0	0	0	0	0	0
1.5488	0.710212	1.20108	1.70747		0.232743	0.275463	0.496475	0.517794		0.797	56.9924	61.4355	63.9726	62.8331	57.0126	43.2892	61.4725	73.4907	69.5726		0.797	34.8754	50.8491	35.9261	29.3435	39.0465	45.8378	53.8407	35.4729	34.1146	31.2832	23.6094	31.8016		0.797	66.0175	50.5133	55.4277	40.0351	46.2973	47.698	41.7182	55.7162	57.7627	55.754	51.7444	51.7497	59.024	44.0792
0.683954	0.77576	1.19446	1.47216		0.281598	0.451857	0.345984	0.485064		1.594	69.116	72.4736	75.5207	85.2344	74.3185	49.6135	61.9221	79.7952	83.2249		1.594	46.0895	59.9735	44.7776	36.0466	47.7372	52.7422	57.3993	45.2762	45.554	42.9041	29.7101	38.0781		1.594	73.1792	60.5622	63.7768	49.1016	55.0171	52.6913	56.1986	67.64	68.0568	66.552	60.6212	62.572	74.2907	60.3095
0.822434	1.03255	0.892366	1.37894		0.236438	0.504472	0.673114	0.506338		2.391	73.3299	87.4326	78.3048	80.7784	86.5968	55.9676	71.4263	81.8866	77.6763		2.391	51.5329	68.8362	55.7268	40.1546	53.7993	70.4428	73.7061	48.4393	58.792	44.0942	33.4929	59.2045		2.391	82.2945	73.3928	74.0498	56.4294	58.9892	59.7941	67.1409	69.7754	70.335	74.5279	67.2815	75.7936	75.9103	66.2768
0.774195	0.976873	1.02819	1.53605		0.193532	0.424114	0.558501	0.340485		3.188	83.1681	80.4119	90.725	89.3702	84.7915	70.9015	81.169	81.6667	84.2245		3.188	47.4588	84.829	59.0364	44.7953	63.8762	69.4286	70.3449	56.211	62.5809	49.7384	40.938	59.6944		3.188	88.9543	75.823	81.1951	66.9179	70.0587	61.0706	65.701	74.7684	72.272	77.5977	73.3367	70.4394	76.368	75.1356
0.805235	0.763823	0.950477	1.49755		0.181903	0.406758	0.732885	0.577226		3.985	78.7185	82.8166	95.8751	87.6253	87.7106	70.0113	80.1805	80.067	89.3488		3.985	49.3842	72.9613	62.7921	51.5498	59.2365	71.3914	76.4118	65.7761	58.6889	56.1184	44.145	70.1394		3.985	79.0469	75.5143	92.4712	64.8259	64.9742	66.9691	71.5518	79.3769	68.1355	81.141	82.1247	70.7348	75.7067	77.1103
0.831932	0.658085	1.14096	1.46601		0.281135	0.473633	0.472558	0.542071		4.782	82.5025	86.1653	97.8641	86.7812	81.8216	81.1546	86.1072	86.8996	94.4655		4.782	55.5343	63.8314	65.8926	52.7117	71.2884	65.0397	80.7555	52.3267	71.7439	66.3089	44.6513	70.5113		4.782	91.247	81.4489	84.5271	74.4466	79.0286	69.3648	69.969	86.5844	77.0347	88.3525	77.843	67.8965	82.7545	75.4696
0.600488	0.796753	1.23468	1.23042		0.277138	0.663923	1.0236	0.622574		5.579	81.0978	89.5148	104.23	91.8055	93.7702	70.9533	84.1051	92.2204	94.5995		5.579	51.2247	72.82	69.1188	63.2789	72.7115	73.6572	84.6467	56.7527	68.843	61.8264	49.5186	68.8628		5.579	88.8682	79.3697	84.3276	68.0105	69.4277	73.7814	73.6557	85.3406	75.191	81.2484	94.3297	73.1944	88.1821	78.8859
1.26811	0.958798	1.11527	1.29296		0.237614	0.530371	0.534371	0.513352		6.376	82.3096	88.2657	102.851	94.164	84.7856	72.6339	93.5871	94.3756	100.876		6.376	66.4482	86.3255	65.5487	60.1473	80.812	76.9186	84.3471	49.5129	71.2663	62.6312	49.2372	78.351		6.376	88.5106	84.806	93.1641	72.1452	71.825	78.7455	74.491	88.1544	71.5157	88.967	81.8506	92.8226	77.1522	73.6058
0.73487	1.24221	1.11787	1.34327		0.172829	0.545758	0.455676	0.439373		7.173	88.9795	95.4935	96.7746	83.9059	85.8904	81.1175	89.8701	92.4339	95.6637		7.173	57.9655	71.172	71.0435	59.0746	72.6475	73.9202	71.8199	56.1877	74.573	64.2435	54.3204	79.3614		7.173	85.6733	85.9208	76.9452	84.3759	76.4736	82.4767	77.2625	82.941	72.4033	89.6241	82.7158	80.8984	87.6739	81.181
0.951947	0.772896	0.806455	1.77811		0.185108	0.763643	0.726483	0.634379		7.97	85.641	97.9906	105.382	92.4183	88.0058	68.4632	96.3549	93.4621	91.1742		7.97	72.0856	79.043	75.781	55.9885	85.1683	75.7602	78.627	56.1494	78.9161	68.7663	63.6517	79.0522		7.97	85.629	89.0623	94.8401	89.816	79.4173	79.6791	76.9991	86.2019	75.5546	87.2802	90.5652	75.7621	80.5345	79.0662
1.0848	0.880548	0.893998	1.53771		0.134832	0.524658	0.724116	0.607104		8.767	82.7429	103.422	108.795	90.7768	99.4738	81.1181	96.1443	86.7952	97.1153		8.767	62.303	96.0158	68.6257	67.3275	83.0804	79.2557	83.287	67.6267	72.1632	70.2825	53.434	82.7749		8.767	88.5623	90.3573	83.8154	67.671	76.6637	81.0672	90.8379	83.2552	73.1573	86.8189	77.3985	78.7303	85.6086	76.4358
0.996946	0.760038	1.05273	1.45558		0.26771	0.12812	0.698009	0.459676		9.564	92.8952	96.7948	103.794	89.0103	94.4493	81.7749	90.669	91.1247	95.1147		9.564	61.804	80.6194	77.0547	49.757	80.1036	65.7016	84.0588	54.0127	81.5393	62.4203	55.8635	78.4763		9.564	95.9698	85.2137	80.6801	71.527	75.3477	83.6047	75.501	84.5092	75.1316	84.3443	87.4297	76.4328	82.6668	80.7463
1.26598	1.07035	1.10552	1.3141		0.252707	0.58345	0.713829	0.557503		10.361	85.55	92.1267	104.722	99.0658	98.717	74.3557	102.829	100.753	91.9909		10.361	66.2605	78.1706	75.0458	58.287	74.6087	79.7644	92.4487	59.0157	75.2861	79.0467	53.7241	84.3987		10.361	98.0715	78.4618	90.0122	82.6461	89.7587	80.7905	90.1156	87.1338	73.1948	87.174	92.2996	90.548	74.9629	86.2463
0.599434	0.816443	0.773216	1.2003		0.268979	0.081767	0.879492	0.830473		11.158	89.8679	94.081	103.964	91.9816	91.3106	77.7178	95.6179	103.519	95.1169		11.158	62.9205	72.1198	70.2119	55.2827	78.7926	70.0322	83.5714	58.3382	74.9566	69.8065	56.2709	97.5461		11.158	97.2184	80.1058	81.7899	76.5691	83.3685	79.2607	89.4692	80.1858	76.6905	87.5648	85.6123	85.2653	82.8908	85.6872
0.799334	0.985905	1.13261	1.3279		0.245075	0.106678	0.928869	0.477905		11.955	90.7898	92.6374	109.426	96.3951	84.9456	78.1719	103.994	103.767	101.026		11.955	68.1096	80.757	65.268	67.7698	88.4954	79.037	72.543	59.4157	81.8954	71.043	56.136	71.9449		11.955	94.4752	84.4668	88.9498	84.6777	81.9886	84.117	85.2895	90.1312	79.8311	92.8901	99.5539	78.2269	83.6326	90.0472
0.854985	0.782106	0.781516	2.34348		0.275156	0.12261	0.568312	0.546927		12.752	90.4952	86.4404	106.632	96.642	105.926	84.3601	97.6048	104.275	97.1355		12.752	70.4984	75.5432	80.3991	64.4386	76.875	67.3372	80.7382	68.9484	78.4886	73.4266	62.7178	87.3168		12.752	88.3809	81.7977	89.0397	83.2055	73.3746	84.9606	78.9719	88.5855	79.0466	94.5167	87.3758	80.6025	89.858	83.0375
1.05233	0.699854	0.871551	2.10064		0.181431	0.077086	0.610914	0.588494		13.549	89.0723	90.3791	105.522	104.431	99.7136	91.0263	100.954	90.6173	99.3544		13.549	66.0165	102.06	78.5447	67.4448	76.9018	70.7526	81.1473	64.8674	75.2459	76.0068	59.9005	77.7729		13.549	96.7034	76.0619	93.788	85.8422	77.2788	88.6822	81.5576	86.125	84.5221	92.5645	89.853	81.8685	93.1199	85.7729
1.31127	0.95922	0.90464	1.56235		0.103593	0.159191	0.572451	0.574315		14.346	87.5465	85.6851	113.052	106.727	91.5117	86.3052	96.0812	110.099	98.4237		14.346	59.269	73.7943	72.6217	59.5906	85.8582	86.7413	76.6252	59.7741	81.4105	76.3941	70.2333	94.7332		14.346	89.8707	90.6429	92.9425	82.2322	85.5034	80.0817	82.435	99.0447	72.0297	97.2686	95.0034	87.8484	85.2315	84.294
0.45129	1.05109	1.14034	1.2584		0.295925	0.127234	0.754488	0.562698		15.143	87.8184	95.2949	107.54	100.82	96.6135	81.9122	89.0548	90.0819	96.9359		15.143	71.9488	82.381	76.3718	76.6675	83.5059	66.0103	72.3073	68.2382	84.6509	77.2394	65.6983	83.7772		15.143	88.2639	80.5807	109.393	81.3687	92.6381	79.3975	83.6728	89.787	76.8766	93.4104	98.7642	87.0465	77.3571	84.6985
1.39919	0.845163	0.956974	1.29791		0.196134	0.151754	0.643873	0.512428		15.94	85.4857	93.2399	102.756	93.0249	94.1535	89.1623	99.0008	109.769	101.494		15.94	74.1814	70.6404	81.746	59.823	82.0656	69.7234	72.5542	68.5799	83.5533	81.0594	64.3219	81.8935		15.94	100.707	84.5212	87.5699	84.6999	75.6676	84.7708	83.3815	93.5781	73.1493	95.2689	93.0844	79.8505	87.2706	87.3791
0.268062	0.738428	0.892214	1.02972		0.215471	0.168562	0.847764	0.541135		16.737	89.4536	88.5438	112.948	93.098	86.1664	84.7353	93.8957	93.0007	101.477		16.737	63.363	80.1698	77.9432	57.5512	89.141	73.5474	87.9493	69.7643	83.081	77.9986	68.5762	87.8323		16.737	104.704	87.4373	87.2552	79.9905	88.4142	85.0675	78.399	89.9198	75.0418	97.4047	95.0645	89.082	85.7418	85.3627
0.394833	1.00616	1.31048	0.830109		0.187507	0.139052	0.440905	1.16496		17.534	83.5654	99.0517	105.327	96.9636	94.9859	95.1349	96.8216	90.0959	94.6105		17.534	65.9473	72.583	82.298	68.8079	74.5631	70.7083	78.311	59.7694	82.1473	81.3648	56.5607	81.4276		17.534	94.835	91.1893	92.2177	100.215	84.7558	77.4806	69.1364	92.9469	78.183	92.9535	96.4861	83.9529	78.3405	99.0952
0.568197	1.11159	1.22578	1.59969		0.168065	0.087398	1.07275	0.884424		18.331	93.6198	97.4884	99.689	102.924	100.932	88.0833	102.992	98.7457	94.7258		18.331	78.4789	85.0637	76.8809	65.9468	78.171	71.8111	84.3527	66.1132	84.3276	74.0867	67.3585	89.9545		18.331	105.615	91.718	85.5723	89.7202	66.3667	79.195	88.8082	93.4481	80.9649	91.4273	95.2431	87.8564	83.881	91.5122
0.723411	0.740034	1.2004	1.12787		0.185942	0.130568	0.873163	1.44356		19.128	86.274	80.4155	96.6668	101.102	107.862	91.0494	100.622	105.964	113.757		19.128	78.2031	83.4405	75.416	63.2726	67.4557	80.2153	82.2182	61.1954	82.5695	70.5846	64.6386	81.276		19.128	102.021	88.2758	88.3305	87.7552	81.0947	83.65	81.4694	95.3233	72.3087	93.9548	101.642	94.1913	88.8827	88.5752
1.28115	1.15226	1.12427	1.56756		0.274764	0.132294	0.59402	0.801416		19.925	89.5601	90.4811	95.361	92.8488	93.6916	84.0212	94.755	112.04	100.601		19.925	72.2238	81.0442	88.1262	61.6363	80.1761	75.6162	81.234	75.3758	72.806	69.0777	57.2455	83.4057		19.925	103.09	94.2935	95.7469	81.8651	78.7882	92.3587	91.1153	88.5433	76.5715	95.539	94.7761	89.9552	91.4501	95.3928
1.16241	0.834527	0.883066	1.38543		0.231052	0.188215	0.481582	1.08335		20.722	83.1516	97.5249	114.37	93.9912	101.659	87.9288	106.486	89.3776	108.301		20.722	61.2341	63.3173	71.2247	65.6232	74.7564	82.3399	86.1776	66.8949	80.6717	73.4024	70.513	87.3895		20.722	98.881	82.4863	109.811	82.7932	70.3139	88.9626	86.5375	87.5879	75.0273	98.506	98.5287	81.7458	86.5045	88.663
1.53897	0.793184	1.19009	2.11417		0.214261	0.374811	0.796013	0.788473		21.519	85.8794	98.844	100.451	95.3387	107.918	99.0109	104.618	104.567	94.4504		21.519	64.0654	74.1825	79.3076	69.0667	77.5855	82.7738	85.7304	57.4061	77.1709	79.9236	67.126	86.1038		21.519	102.085	80.0963	86.0298	93.4955	83.1629	88.8428	84.9694	99.32	77.9478	85.7095	103.716	78.6818	96.8975	87.9351
1.21913	1.25823	0.904214	1.54249		0.142448	0.098759	0.523364	1.05423		22.316	98.0275	94.6066	103.098	100.385	98.9281	99.6845	98.4127	110.092	98.0161		22.316	77.5498	84.0806	80.483	65.5816	75.5271	76.9603	95.698	65.6958	87.2049	88.4634	57.7686	74.71		22.316	93.873	77.5453	96.3785	88.5287	75.4829	95.1437	84.6736	89.1081	82.9137	103.319	96.7311	83.5635	89.435	100.869
1.52902	1.01422	0.955539	2.08772		0.142263	0.104473	0.853686	0.863852		23.113	88.9588	91.2968	109.446	94.9003	104.864	83.1712	101.022	108.503	96.5172		23.113	74.6158	60.2787	73.5375	69.5612	82.8428	69.7802	84.2756	71.0103	76.5921	72.8167	63.6472	86.6561		23.113	100.864	83.6637	101.658	86.3829	64.4751	91.0291	83.722	83.3964	72.1251	93.4937	94.7491	82.6387	94.5513	77.7276
1.3552	1.33645	1.09425	1.69474		0.219775	0.217702	0.85018	0.938802		23.91	85.4294	95.5215	116.265	96.7323	94.9255	83.9275	107.055	107.608	97.123		23.91	71.1416	81.2102	79.9974	66.3707	76.6371	78.8642	79.3622	65.9988	92.0677	92.3727	68.0468	81.4756		23.91	92.87	85.8269	104.494	86.876	72.245	86.098	85.9421	75.2899	69.8765	97.9366	88.0376	85.8248	91.7884	81.2925
0.909503	1.58811	1.03988	1.24619		0.224891	0.358554	0.564536	0.90251		24.707	90.1276	97.878	101.255	92.4005	90.1424	87.5902	102.478	106.649	106.598		24.707	76.0754	71.0089	81.1669	61.8781	79.6528	79.4605	86.9496	79.5866	82.7571	83.1981	65.4908	83.9618		24.707	101.34	79.7036	92.4946	88.109	87.5928	85.4323	86.96	80.5776	69.6499	98.3377	88.3297	95.2988	86.094	88.1477
2.92048	1.96164	0.972767	1.58192		0.395982	0.259648	0.513308	1.02031		25.504	88.7334	100.98	106.404	105.908	92.2106	86.2293	108.153	102.967	96.1437		25.504	55.0816	72.7122	78.1445	66.2224	76.7224	74.3484	76.2408	65.8719	82.1063	79.065	71.3973	82.4681		25.504	98.0055	84.8046	91.9372	94.7824	79.0822	84.8204	92.4889	83.5028	75.4965	93.845	91.6048	85.9741	96.7133	86.5109
0.539005	1.46167	1.03616	1.72872		0.442295	0.263841	0.490872	1.03269		26.301	84.8855	85.6442	108.28	94.0169	89.8309	80.0749	113.973	97.1041	105.471		26.301	71.066	82.0311	88.8435	70.1065	81.8755	71.0854	80.4573	68.8446	84.9742	76.789	69.9597	86.9012		26.301	98.3945	82.2622	101.978	78.1959	84.1567	85.1517	82.6168	86.1606	76.4338	98.616	98.4084	89.215	90.2338	78.2848
1.20252	1.11088	1.44025	1.34659		0.429644	0.18197	0.443634	1.07793		27.098	88.3678	103.656	103.91	91.071	96.3899	82.0969	109.449	97.5598	103.311		27.098	68.2737	77.9955	78.9778	72.7009	86.1872	77.8386	80.5679	64.8478	83.4453	76.7019	69.6502	88.6911		27.098	105.973	79.6999	91.8014	85.5133	69.8698	89.4699	88.0471	84.6734	75.0941	93.7612	100.217	85.4945	87.4251	92.3198
0.689011	1.33449	0.847306	1.57534		0.348774	0.227176	0.432831	0.986979		27.895	84.9413	96.2757	103.807	90.472	98.3504	83.4094	115.11	99.0238	101.082		27.895	67.0179	79.0958	83.0645	77.619	87.8866	75.5849	96.5885	63.8065	83.6416	75.9758	67.302	77.1602		27.895	107.248	84.8276	89.3003	88.2968	68.0194	88.2147	81.6003	81.5379	74.4909	97.2548	90.2004	84.847	83.9613	81.476
0.979102	1.32536	1.03376	1.30941		0.378156	0.224285	0.69609	0.857684		28.692	91.0681	94.6599	101.922	86.6227	99.9672	97.373	108.676	100.281	91.0829		28.692	66.1939	78.5083	74.9863	81.6342	88.0162	68.1597	85.0461	62.3416	81.1503	77.5284	72.3344	82.1232		28.692	106.607	75.1835	86.4371	87.6488	82.5289	86.4349	87.0184	84.7664	78.7758	93.4374	92.1453	87.4159	85.1959	96.3807
1.60746	1.73285	1.25354	1.3923		0.368063	0.168678	0.550898	0.943986		29.489	88.1383	95.7565	107.382	97.5229	91.8789	82.5447	105.645	107.133	100.026		29.489	75.695	80.268	73.3793	91.3863	88.3642	75.1203	97.1882	66.0349	75.4601	82.6487	66.8268	80.5735		29.489	100.436	74.1929	85.1694	88.1846	75.9112	85.0247	83.5828	81.696	74.9506	94.512	88.6548	86.107	88.2511	94.6679
2.09207	1.83044	1.23667	1.63188		0.473464	0.433097	0.75829	0.740147		30.286	84.6663	98.8882	116	80.3658	104.471	92.7969	108.547	105.089	89.1504		30.286	79.4803	71.7927	79.0777	75.6462	85.3407	78.9768	83.0431	72.9953	76.4735	70.495	76.5507	78.6457		30.286	103.567	91.9908	92.2945	79.7567	84.3913	83.9338	84.594	80.6728	84.1634	86.8379	88.436	88.8177	82.8839	92.2425
1.86505	1.87284	0.728342	1.63032		0.455861	0.394919	0.542085	0.773672		31.083	86.434	98.1511	107.066	98.7756	97.0351	80.2447	122.19	114.331	98.8737		31.083	68.43	72.623	87.3498	74.0038	83.2401	79.1368	98.5787	70.2532	83.0131	79.5529	68.2443	83.0073		31.083	104.3	88.6893	108.983	95.7023	90.0161	92.6924	81.1265	82.3274	79.1349	96.4981	94.4976	91.3198	84.055	90.6504
1.48506	1.09821	1.15647	1.4074		0.390822	0.36991	0.561721	0.927085		31.88	93.0427	93.7429	107.88	102.226	90.8703	79.6102	106.476	116.749	96.2949		31.88	58.899	68.0085	77.8585	76.647	84.216	74.0688	100.005	66.2831	73.7674	86.0122	77.6275	81.3917		31.88	107.392	88.3515	88.4308	90.3142	75.5516	87.4898	78.2489	86.2254	76.4844	91.0031	94.6386	82.8793	87.8855	96.0609
1.6063	1.39166	2.12221	1.65952		0.401601	0.231432	0.514536	0.877979
1.77442	0.903151	1.32902	1.47865		0.369022	0.448615	0.348801	1.2338
0.421793	0.994439	0.89605	0.734292		0.504993	0.243035	0.589847	1.27407
0.430956	0.855625	1.33542	0.48545		0.426544	0.264141	0.478237	0.424077
0.604664	1.36635	1.10938	0.911893		0.310664	0.343371	0	0.426342
0.453874	1.03963	0.869335	0.708016		0.385154	0.34422	0.21702	0.405981
0.364363	1.09171	0.833671	0.730144		0.139832	0.458036	0.166965	0.507289
0.608758	1.02945	1.10938	1.28544		0.229214	0.490603	0.264579	0.393296
0.541538	1.35809	1.92077	0.53886		0.556799	0.271217	0.344352	0.365339
0.461539	1.6064	1.65107	0.733292		0.476522	0.32239	0.121367	0.478834
0.976211	1.01595	0.988472	1.54762		0.423443	0.18928	0.157139	0.424357
0.531399	1.26353	1.40611	0.861157		0.517795	0.307028	0.182439	0.406296
0.675442	1.53584	1.26545	0.887544		0.587428	0.181224	0.184923	0.370017
0.577096	1.76543	0.910225	0.910864		0.514864	0.369772	0.53816	0.427078
0.577896	1.5551	1.06303	1.03409		0.541119	0.350941	0.50187	0.523209
0.353557	1.52533	0.772766	0.76968		0.530294	0.393117	0.257913	0.426788
0.366354	1.04651	1.16775	0.529375		0.548652	0.24899	0.22626	0.388373
0.660449	1.00089	1.21237	0.858398		0.435944	0.293464	0.313157	0.362547
0.584807	1.23104	1.02355	0.717059		0.473611	0.41657	0.455264	0.380685
0.512596	1.12025	1.49223	0.781807		0.591007	0.356229	0.577681	0.435161
0.689887	1.06305	1.12223	0.760149		0.615247	0.550013	0.947361	0.632937
0.769625	1.05457	1.03034	1.14349		0.354701	0.418995	0.793004	0.350516
1.15092	0.858207	1.02676	1.2628		0.399216	0.607075	0.530179	0.37035
1.16896	1.36695	1.49387	2.38268		0.341784	0.378318	0.53837	0.680925
1.25812	1.10045	1.36909	1.53283		0.253988	0.407168	0.778513	0.594514
0.794155	1.26812	1.12241	1.27055		0.265085	0.321659	0.580842	0.858036
0.642296	1.14306	1.22911	0.996537		0.37943	0.253431	0.638108	0.441499
0.552957	1.3263	0.803269	0.709745		0.418894	0.639909	0.636795	1.08058
0.672133	1.18615	0.731803	0.791202		0.307058	0.473491	1.38027	1.03279
0.506651	1.22228	0.869217	1.90263		0.339274	0.348274	0.897255	1.42584
0.349825	1.06763	1.04868	1.1652		0.200908	0.305047	1.02808	1.29172
1.21101	1.11561	0.945063	2.22691		0.303129	0.348372	0.490141	1.3442
1.28749	1.11982	1.76098	1.72094		0.31259	0.402657	0.520883	1.14814
1.62738	1.17786	1.53832	1.48358		0.287823	0.318289	0.452564	1.25006
1.20825	0.977703	1.39332	1.19674		0.327523	0.269723	0.889566	3.19547
0.66293	1.34542	1.14683	1.9207		0.290168	0.400126	0.343133	1.71345
1.63321	1.26428	1.20773	1.60394		0.269072	0.271833	0.528382	1.57792
0.618894	1.49223	0.974766	1.23575		0.289213	0.27327	0.429035	2.09152
0.753387	1.37634	0.987959	1.20974		0.321148	0.433524	0.41769	1.15256
0.800761	1.21321	1.35087	1.13081		0.2116	0.296903	0.641736	1.60496
0.674182	1.60443	1.76035	1.07301		0.331772	0.35591	0.387734	1.13207
0.641522	1.4704	1.75448	0.702147		0.263557	0.451827	0.511861	0.916067
1.69966	1.22582	0.988889	1.25865		0.256411	0.260878	0.873816	1.27572
2.22653	1.43729	1.20023	1.45185		0.195993	0.40162	0.526563	1.25838
1.1723	1.22863	1.1527	1.37879		0.379805	0.238451	0.548137	1.45665
1.58418	0.931728	0.983944	1.45828		0.422045	0.202608	0.434895	1.33388
0.685034	1.19463	1.22627	1.31489		0.374594	0.363493	0.493325	1.40223
0.619657	1.44174	0.73356	1.38458		0.313649	0.389898	0.599445	1.43472
0.912357	1.50364	1.08441	2.33449		0.280897	0.474798	0.68884	1.29141
0.874451	1.18867	1.08329	1.70885			0.528004		1.19556
0.900548	1.5781	1.25764	1.72209		0.662125	0.255549	1.07758	1.41163
1.07113	1.25584	1.13766	1.77889		0.563979	0.426501	0.565458	0.767456
2.14895	1.84448	1.10436	1.67184		0.640448	0.27813	0.976772	0.592041
1.98841	1.30133	0.662344	1.92276		0.422563	0.405311	0.526739	0.890482
1.07033	1.01582	1.21734	1.24976		0.588631	0.305729	0.768839	0.535438
1.59668	1.28496	1.45473	1.20256		0.625233	0.387474	0.530163	0.763756
0.782534	1.12919	0.997322	1.4041		0.667453	0.396131	0.565005	1.13843
1.28648	1.40722	1.14624	1.46122		0.449021	0.497325	0.479844	0.768972
1.11684	1.03361	1.1785	1.59296		0.419751	0.404474	0.601545	0.532429
0.989317	1.14806	1.16898	1.15544		0.510735	0.377139	0.280732	0.548729
0.910473	1.11458	1.21021	0.643734		0.577303	0.074334	0.255705	0.510292
1.72856	1.00621	1.08548	1.0148		0.63017	0.202637	0.503395	0.553027
1.07488	1.02093	1.07862	0.658012		0.479695	0.311939	0.806551	0.694317
0.986027	1.04321	1.27479	1.07128		0.739039	0.404486	0.319078	0.411689
0.825251	1.09449	1.04596	1.06807		0.483285	0.092332	0.190372	0.567197
1.34951	1.09034	1.03705	1.23493		0.593211	0.34591	0.232893	0.742954
0.429618	1.04345	1.03296	0.893509		0.536127	0.172367	0.290294	0.460008
0.714812	1.18211	1.26114	0.55939		0.581487	0.256414	0.253026	0.538415
0.91619	1.39359	1.29583	1.00859		0.52844	0.245702	0.200505	0.902941
0.929329	1.17986	1.04991	1.17232		0.502312	0.111783	0.425993	1.05728
1.367	1.59815	1.07602	2.27101		0.582658	0.125496	0.210401	0.721202
1.45048	1.2296	0.9804	1.67423		0.448516	0.105013	0.162596	0.47469
0.875745	1.65495	1.1151	1.3138		0.376265	0.1311	0.273334	0.546298
0.820908	1.13468	0.744697	1.31192		0.790234	0.189835	0.291523	0.54832
0.925208	0.967192	0.981155	0.987774		0.556281	0.368596	0.314121	0.446425
0.465585	1.46557	1.22264	0.792871		0.452743	0.163024	0.237813	0.420632
1.78793	0.677343	1.33928	1.49532		0.347548	0.201858	0.339238	0.494293
1.79517	0.702	1.16028	1.21379		0.12326	0.064376	0.246063	0.374434
1.70585	0.494262	2.04029	1.3903		0.620602	0.037861	0.299864	0.603281
0.803391	0.904206	0.961605	1.67077		0.546427	0.082958	0.288325	0.395906
1.2031	0.67365	0.651502	2.33242		0.654086	0.055837	0.132938	0.483438
0.85986	0.660811	0.662796	1.42997		0.526762	0.07653	0.187909	0.597355
1.15057	0.894578	0.645698	1.7481		0.523162	0.026647	0.32178	0.575304
0.851099	0.517151	0.66815	1.34115		0.349029	0.114776	0.294991	0.585291
0.839655	1.05931	0.564061	1.60144		0.805912	0.141051	0.223065	0.543853
1.34156	0.860694	0.678163	1.41129		0.594133	0.031155	0.227567	0.419138
1.31474	0.971746	0.560059	1.35567		0.760156	0.125771	0.22477	0.472694
0.849875	0.60791	0.570774	1.02112		0.642587	0.200413	0.299515	0.48021
0.533397	0.466221	0.748	1.43026		0.442851	0.247294	0.296952	0.373071
1.08649	0.491473	0.721845	1.94507		0.697337	0.153561	0.246181	0.404956
0.934119	0.946501	0.713503	1.08114		0.468022	0.322208	0.229585	0.344662
0.868885	1.07274	0.795558	1.33878		0.649513	0.096476	0.306822	0.35829
0.807121	0.852344	0.54259	1.70297		0.50072	0.227564	0.172806	0.270006
0.976681	0.823217	0.614409	2.38328		0.500465	0.134982	0.116582	0.58911
1.10756	0.825183	0.75685	1.56739		0.486614	0.205311	0.230707	0.439146
1.00398	0.71208	0.749082	1.21562		0.502129	0.110842	0.169485	0.454864
0.387047	0.652396	0.71368	1.69087		0.46708	0.065862	0.156902	0.431322
0.886361	0.768509	0.790002	1.63235		0.527442	0.107232	0.280798	0.46269
1.59826	0.867686	0.587339	0.942633		0.447814	0.141513	0.196637	0.396837
2.57245	0.513345	0.739479	1.36137		0.530299	0.239776	0.294691	0.519191
0.940141	0.750921	0.706322	1.06021		0.422184	0.180266	0.239775	0.435308
2.07389	0.718108	0.67331	1.76981		0.546768	0.240647	0.282701	0.986393
1.30082	0.93331	0.865885	1.98059		0.402309	0.268207	0.178714	1.09572
1.3796	0.839924	2.96336	1.49825		0.394852	0.270235	0.167497	1.20656
0.913132	0.696739	1.67687	1.37645		0.451615	0.224842	0.197427	0.556216
1.73507	0.933398	0.613288	1.83945		0.568849	0.158168	0.206785	0.500293
1.19939	0.799987	0.671924	1.53629		0.519207	0.153734	0.223877	0.55962
1.16996	0.752964	0.831265	1.38797		0.557795	0.256497	0.192653	0.682204
1.07085	1.09391	0.71989	1.92054		0.487355	0.179144	0.217805	0.577591
1.68129	1.1926	0.799457	1.78452		0.488482	0.122769	0.148699	0.753102
1.22709	1.78426	0.596623	1.46949		0.53552	0.235242	0.164098	0.577909
1.24528	1.26999	0.684603	1.07628		0.602371	0.138273	0.0843282	0.705592
0.702302	1.50705	0.750464	1.53674		0.562734	0.246809	0.136356	0.471895
0.764723	0.831134	1.28268	1.13776		0.605746	0.25305	0.155779	0.481304
1.97622	0.872013	2.14391	1.28074		0.60289	0.174006	0.153117	0.566976
0.953099	0.607964	2.63381	1.25335		0.509631	0.154342	0.266187	0.312995
1.07863	0.716948	0.857561	0.943839		0.512708	0.281784	0.152293	0.950509
1.31598	0.980715	0.751371	0.936803		0.125534	0.209255	0.460416	0.398587
1.61078	0.76513	0.965961	1.25156		0.209477	0.269166	0.315328	0.534067
1.47056	1.0597	0.613603	1.46769		0.187134	0.172695	0.377024	0.640002
1.00543	0.690862	0.551168	1.19626		0.209709	0.197661	0.374314	0.600394
1.968	0.737276	0.756113	1.11209		0.167093	0.18336	0.291849	1.02639
1.09323	0.951215	0.63504	1.03475		0.238536	0.175518	0.442727	0.940098
1.61189	0.804033	0.788228	1.15247		0.187222	0.140397	0.464903	1.02334
1.12313	0.921108	1.858	1.03587		0.187642	0.14454	0.38668	0.649563
1.43852	1.15666	1.08255	1.13985		0.175014	0.203947	0.636743	0.593767
1.50893	0.786443	0.710563	1.09625		0.193574	0.209048	0.360618	0.766581
1.13739	1.33059	0.769177	1.14489		0.238845	0.194728	0.438914	0.495799
0.950009	1.24502	0.636206	1.38297		0.149142	0.382768	0.283786	0.272091
1.08209	0.935259	0.64911	1.1624		0.1826	0.143513	0.379329	0.480985
1.2351	1.18034	0.820226	1.50714		0.183874	0.192208	0.393564	0.569288
1.17325	1.29928	0.717674	1.33471		0.17328	0.416701	0.352554	0.865836
0.788563	1.4507	0.746687	1.45495		0.266163	0.356713	0.302322	0.612104
0.905262	1.19242	0.745691	1.67657		0.253315	0.25704	0.27552	0.776757
0.940498	0.855123	0.565324	1.55694		0.198922	0.119155	0.396468	0.615368
1.18855	1.23914	0.579265	1.79228		0.218067	0.293399	0.464836	1.19429
1.37224	0.901147	0.900783	1.56867		0.211103	0.298344	0.360932	0.967499
1.44679	0.684418	0.63222	2.26768		0.159034	0.139801	0.364754	0.454092
1.09986	1.06433	0.577509	1.46949		0.301209	0.14015	0.365314	0.399443
1.05003	0.829491	0.775561	1.20451		0.269264	0.109826	0.455129	0.692267
1.05527	0.804693	0.824891	1.31744		0.282609	0.155933	0.339983	0.713551
1.95558	1.105	0.700012	1.5232		0.253794	0.125542	0.209377	0.618275
0.957231	0.845606	0.778162	1.79618		0.346485	0.433403	0.262203	0.675615
1.00332	0.059397	0.847338	1.69862		0.181358	0.329891	0.174634	0.77948
1.26104	1.08183	0.612479	2.01036		0.200912	0.318202	0.151485	0.754988
0.925604	0.791968	0.605013	1.70829		0.230508	0.312092	0.190656	0.267327
2.50726	0.751584	0.672324	1.33691		0.179196	0.365801	0.138474	1.20487
1.18886	0.642245	0.613092	1.77349		0.180372	0.355931	0.200849	0.540989
1.99051	0.740912	0.720391	2.70461		0.258944	0.220097	0.215022	0.638282
1.41389	0.729379	0.847222	2.07498		0.208908	0.331435	0.269321	0.198599
0.999331	0.719873	1.02033	1.5555		0.200469	0.190968	0.216144	0.868094
1.12576	1.03695	1.49273	1.51946		0.30464	0.353368	0.120113	0.973024
1.29322	0.862492	1.69948	1.71414		0.235651	0.316787	0.142625	0.803476
1.44608	0.822918	1.07047	1.95541		0.199256	0.238985	0.190965	1.33367
1.25791	0.923834	1.05862	1.99796		0.160762	0.397898	0.179088	0.951725
1.41747	1.15136	1.02392	1.70096		0.207603	0.369791	0.153188	1.43955
1.22024	0.607963	1.16513	1.83174		0.177247	0.448502	0.134432	1.01192
0.979086	0.945826	1.1501	1.80916		0.177613	0.494887	0.228196	0.770482
1.11823	0.871752	1.02291	1.61598		0.174587	0.455854	0.174626	0.684991
1.09152	0.810406	0.966537	1.65231		0.129701	0.443065	0.130086	1.38338
1.04485	0.582198	0.935056	1.79578		0.223318	0.450856	0.185589	0.947765
1.12523	0.593756	1.24377	1.67054		0.25093	0.256191	0.169226	1.08231
0.985483	0.780934	1.94302	1.78473		0.327739	0.484398	0.180239	0.969101
1.30634	0.914476	1.23755	1.87345		0.299733	0.491375	0.199919	1.97047
2.16063	1.28686	1.32469	1.43874		0.175759	0.970254	0.185535	1.34838
1.33173	0.776151	1.11378	1.24394		0.142924	0.598143	0.169051	0.909288
0.876015	0.577652	1.15416	1.30465		0.177078	0.587072	0.213714	2.02747
0.749669	1.25945	0.87777	1.35329		0.389718	0.728759	0.143065	0.745521
0.639193	0.718125	0.931163	1.35147		0.254179	0.235218	0.181194	1.67488
0.879034	0.514075	1.20211	1.43456		0.194267	0.513315	0.177324	0.880832
0.930328	0.487776	1.12928	1.60677		0.211082	0.378782	0.138988	0.908797
0.598565	0.662664	0.957835	1.58657		0.230046	0.629903	0.156051	0.765083
0.888285	0.474751	0.703441	1.41855		0.189938	0.396742	0.176768	0.401265
0.760004	0.372997	1.01037	1.42825		0.185104	0.470987	0.136142	0.428939
0.801693	0.533264	1.07906	1.97682		0.183909	0.758628	0.365605	0.423702
1.00991	0.578161	1.13803	1.44772		0.254897	0.789054	0.162115	0.396916
0.739218	0.325898	1.30387	1.51518		0.317432	0.686285	0.174597	0.297302
0.975176	0.435486	1.48346	1.82295		0.221349	0.511656	0.2422	0.251416
1.2543	0.618301	1.09025	1.49482			0.34293		0.727864
0.942829	0.548049	0.954657	1.6565			0.325738		0.468338
1.20988	0.396244	0.682405	1.17509			0.601735		0.379626
1.0138	0.461785	0.988053	1.42927			0.425607		0.283764
1.50268	0.475694	1.23128	1.51893			0.479088		0.234803
1.98964	0.503341	0.961555	1.65648			0.594943		0.443308
1.04152	0.534765	0.975217	1.44364			0.306038		0.310165
1.08987	0.361568	0.932659	1.38454			0.491939		0.538941
0.936311	0.669877	1.04783	1.40515			0.485291		0.44244
1.41367	0.513181	1.07003	1.54347			0.759979		0.57977
0.898409	0.579717	1.10338	1.52838			0.450161		0.305947
1.15013	0.517748	0.944036	1.80644			0.52748		0.812694
1.0758	0.64879	1.01167	3.89363			0.353171		0.55826
0.899739	0.84584	1.04838	1.25038			0.415333		0.729285
1.03119	1.15337	1.09109	1.6408			0.352968		0.326716
1.65107	1.38166	1.23496	1.63982			0.376406		0.525373
1.14329	0.980464	1.03513	1.9932			0.477271		0.489824
0.985788	1.33115	0.939452	3.91847			0.304393		0.694055
1.13008	1.3514	1.19039	3.79735			0.378737		0.760767
1.09368	1.17543	0.99354	3.48551
1.64771	1.1927	1.57951	1.76018
1.11933	1.1306	1.00615	1.92126
1.32478	1.12158	1.21682	1.5188
1.47973	1.39248	1.46971	1.56259
0.765656	1.2895	4.10672	2.35461
1.42932	0.91388	2.20533	2.24029
1.31689	1.11409	3.35229	2.21243
1.53119	1.03643	0.690972	2.50365
1.39902	0.930003	0.906852	1.84642
1.20389	1.04808	1.06947	2.17912
1.14253	1.11447	1.41247	0.651223
1.19558	1.17041	0.975376	0.770235
1.13869	1.30637	0.895386	0.627188
0.952589	0.936264	1.25581	0.49874
	1.2505		1.35567
	1.08711		1.28074
	1.02749		1.08114
	1.1697		1.54051
	1.4728		1.00578
	1.34037		1.15355
	1.27171		1.25297
	1.4945		1.43702
	1.61728		1.73547
	1.45486		1.08706
	1.09316		1.3064
	0.958837		1.01555
	1.49693		1.94432
	1.40855		1.05235
	2.00231		1.15995
	0.966935		1.25356
	1.26179		1.19047
	0.991509		1.61741
	1.39778		0.983418
	1.10908		1.40442
	1.1817		1.12745
	1.52097		1.3082
	1.13635		1.27158
	1.08052		0.87589
	1.28273		0.785801
	0.895582		0.85341
	0.916518		1.18177
	1.32385		1.44259
[truncated: 15 more columns]
