# Supplementary material for: Protein Phosphatase 1 inactivates Mps1 to ensure efficient Spindle Assembly Checkpoint silencing
Source: eLife. 2017 May 2;6:e25366. doi: 10.7554/eLife.25366 (PMC5433843; doi:10.7554/eLife.25366)
Supplement: Figure 3—source data 1. — DOI: http://dx.doi.org/10.7554/eLife.25366.018 [file elife-25366-fig3-data1.xlsx]

## Sheet: Source data Figure 3
Figure 3 E,F	EGFP-Mps1/MBP-PP1-87B			normalized signal				Figure 3 J,L	PROMETAPHASE KTs			Figure 3 K,L	METAPHASE KTs
	Mps1 WT	Mps1KAFA	Mps1WT Sds22 RNAi	Mps1 WT	Mps1KAFA	Mps1WT Sds22 RNAi		pMps1/EGFP-Mps1WT	pMps1/EGFP-Mps1KAFA	pMps1/EGFP-Mps1WT PP1-87B RNAi		pMps1/EGFP-Mps1WT	pMps1/EGFP-Mps1KAFA	pMps1/EGFP-Mps1WT PP1-87B RNAi
exp1	0.165525	0.086003		1	0.513535			0.609592	2.46788	1.18302		0.658091	2.06291	1.23023
exp2	0.120132	0.0236364	0.0423453	1	0.196753	0.35249		0.530103	2.19017	1.38541		0.61156	2.20967	1.24768
exp3	0.543897	0.106884	0.101695	1	0.196515	0.186975		0.60373	2.70541	2.63141		0.521815	1.83605	1.24368
								0.467677	2.1795	2.73964		0.713188	2.38695	1.20914
								0.618898	2.59383	3.17996		0.672521	3.84356	1.31135
								0.77536	2.09399	2.26321		0.724393	3.2582	1.2807
Figure 3H,I	pMps1/EGFP-Mps1							0.719624	1.61897	2.05428		0.568413	3.84454	0.257251
GS-PP1 (nM)	Mps1 WT IP	Mps1KAFA IP	Mps1 WT IP	Mps1KAFA IP				0.732653	2.53679	1.41658		0.66901	3.89827	0.306149
0	0.571605	0.401895	100	100				0.887651	2.50408	1.89219		0.533591	1.88283	0.225132
12.5	0.157934	0.187089	27.6299	46.5516				0.489794	1.84163	2.23701		0.810972	3.63567	0.248185
25	0.140233	0.137111	24.5332	34.116				0.556437	2.06623	1.53533		0.680768	1.52144	0.215517
								0.496319	1.57621	2.31402		0.552716	3.2779	0.225772
0	0.715682	0.741	100	100				0.601448	1.59795	1.15937		0.602436		0.306231
12.5	0.0717629	0.466266	10.0272	62.8725				0.638886	2.16121	2.39182		1.02697
25	0.0436569	0.128155	6.10004	17.2808				0.922565	2.13776	2.03671		0.600308	0.753913
								0.578407	2.13612	2.55985		0.579758	0.978047
								0.601787	1.98778	2.06585		0.548288	1.05525
								0.773162	1.86322			0.576155	0.753766
								0.460594		3.62822			0.642071	1.22337
								0.487532	0.497349	3.98701			0.958183	0.874619
								0.646665	0.587447	1.95711		0.20001	0.643303	1.1845
								0.585518	0.613177	3.72851		0.148434	1.51902	0.883686
								0.524069	0.705646	4.0488		0.234783	0.858371	1.4296
								0.515247	0.497608	2.12689		0.160894	1.12576	1.69207
								0.427181	0.493202	3.68756		0.219762	0.928305	1.25782
								0.536728	0.494784	2.53917		0.186072	1.02751	0.799772
									0.616313	2.96551		0.124995	1.38114	1.04969
								1.47004	0.594311	3.17575		0.147909	1.16073	2.2843
								1.29839	0.669916	2.91728		0.182352		2.7439
								1.11783	0.579759	2.5663		0.211526		1.91221
								0.878331	0.523994	2.31122		0.234363		2.26428
								0.937484	0.71935			0.170089	0.646166	1.78144
								0.74511	0.61141	0.969177		0.217554	0.590585	0.993889
								0.751104	0.469498	0.859579		0.202015	0.662192	1.04323
								1.06558	0.430737	1.49724		0.154721	0.539303
								0.707366	0.554897	0.661818		0.190818	0.782613
								0.778772	0.525368	0.553286			0.834224
								0.8022	0.539286	0.540648			0.569991
								0.903286		0.397199			0.765627
								0.795033	0.484447	0.469093		0.286004	0.910485	0.714472
								0.873962	0.409589	0.511881		0.265468	0.659098	0.949313
								0.716566	0.396406	0.48001		0.418636	0.733746	0.849842
								0.776513	0.470531	0.674149		0.252897	0.77176	0.804879
								0.842672	0.36145	0.744695		0.266681	0.819804	0.699663
								0.719696	0.345367	0.718994		0.441497	0.625718	0.810434
								0.637758	0.464747	0.861071		0.48317	0.701262	0.651057
								0.571437	0.507519	1.02891		0.281067	0.51725	1.08678
								0.976015	0.57213	0.509994		0.227116	0.728165	0.935584
								0.865726	0.426038			0.314623		1.1065
								0.794592	0.528924			0.323133		1.60648
									0.474465			0.253573	2.72095	1.55501
								1.42651	0.427284			0.379723	2.17542	1.79001
								1.51101	0.483544			0.245311	3.96533	1.53592
								1.41517	0.498929			0.214918	4.86907	0.707905
								1.52551	0.416818			0.310626	3.37737	1.02078
								1.41633	0.474223				2.29414	0.880619
								1.27144	0.496748	0.722349			2.10057	1.9284
								1.5785	0.553112	0.669812			3.81969	1.36917
								1.31819	0.396133	0.588744		0.232617		0.984151
								1.13338	0.686815	0.762823		0.247477		0.875797
								1.18945		0.541373		0.182625	1.41301	0.792088
								1.4121	0.470705	0.692304		0.240983	1.37753	1.6874
								1.45563	0.542921	0.884077		0.155332	1.44138	0.666121
								1.49218	0.447163	0.884048		0.300237	1.22696
								1.29605	0.582966	0.980235		0.158492	0.871638
								1.34809	1.24242	1.09267		0.27459	1.61145
								1.51785	1.11898	1.0199		0.244865	0.797691
								1.53655	0.324713	0.643389		0.246303	0.584014
								1.35496	0.345627	0.750615		0.282824	1.95555
									0.579166	0.765423		0.377758	1.18579
								0.28884	0.520962	0.699648		0.435012	0.858358
								0.272665	0.544464	0.738476		0.229446	0.705151
								0.425643	0.464185	0.759289		0.353152	1.26254
								0.315856	0.52116	0.649564		0.321315	0.977889	1.07698
								0.255835	0.556656				1.35598	1.96669
								0.262753	0.573483	1.10168			1.47795	2.84307
								0.25622	0.525457	1.15555		0.322372	1.11102	3.54128
								0.293564	0.582262	1.3123		0.34281	1.51628	2.07431
								0.236607	0.599699	1.2995		0.464486	1.05236	1.82304
								0.302028	0.584863	1.78478		0.500192	1.50129	3.92525
								0.337384	0.500764	1.69963		0.513258		1.82817
								0.415605		1.47059		0.652361		2.32001
								0.363978	0.472233	1.75328		0.546649		2.70921
								0.456511	0.475356	1.32967		0.327386		1.6485
								0.465056	0.271613	1.46222		0.521563	2.3134	2.55557
								0.481325	0.233603	1.38774		0.551308	2.27697	1.82275
								0.351819	0.365883	1.21193		0.38922	3.41247	1.80468
								0.484438	0.474335	1.11689		0.423494	3.28918	1.82203
								0.584459	0.555115	1.25097		0.51781	2.79469	2.14141
								0.83522	0.524203	1.0321		0.472622	2.0851
								0.37557	0.369214	1.45093		0.403145	1.82376
								0.326875	0.341942	1.45193		0.650291	1.25332
									0.372342	1.69494		0.508928	2.56782
								1.05663	0.419571	1.65779		0.426618	1.56078
								1.26884	0.289135	1.35852		0.45524	3.68448	0.422142
								1.11382	0.340282	1.14783		0.328292	2.27271	0.721498
								1.2598	0.353868	1.10255		0.357242	4.34301	0.506294
								1.11613	0.298778	1.20753		0.372263	1.05695	0.631359
								1.26234	0.268682	1.29629			2.02903	0.67738
								0.905632	0.290999	0.891061			1.954	0.607133
								0.88457	0.385782	0.966197			5.16332	0.37365
								1.19747		1.07751		0.26033	1.50053	0.405374
								1.15465	1.56776	1.15555		0.336632		0.671663
								0.814635	1.85449	1.11558		0.295205		0.526838
								0.635833	1.68773	1.18088		0.349151		0.334641
								0.959118	1.73738	1.23558		0.291495		0.657556
								0.796382	1.40463	1.41597		0.221716		0.696093
								0.795788	1.59037			0.212773	0.116678	0.711595
								0.997434	1.77511	0.615737		0.190456	0.264062	0.650437
								0.913192	2.10026	0.567834		0.276836	0.199679	0.538523
								0.666749	1.59819	0.65443		0.235814	0.171063	0.463038
								0.81398	1.38956	0.446871		0.294507	0.230901	0.548365
								0.831549	1.89273	0.625028		0.218798	0.251105	0.524342
								0.879219	1.3689	0.560961		0.237635	0.169111	0.718268
									1.91323	0.596719		0.244902	0.220016
								1.12629	1.81571	0.485441		0.242758	0.246886
								0.87693	1.42688	0.637414		0.350716	0.191314
								0.740964	1.59035	0.652105		0.251523	0.169737
								0.692755	1.74281	0.587003		0.231416	0.180764	0.538132
								1.08188	1.41319	0.78824		0.31766	0.14284	0.700163
								0.949502	1.58707	0.692526		0.235626	0.196166	0.617741
								1.07712	1.33704	0.710191		0.238598	0.188912	0.805664
								1.1322		0.525109		0.322698	0.228546	0.603609
								0.752222	0.904712	0.529701		0.26695	0.278802	0.679486
								1.32013	1.78706	0.661623		0.161193	0.231745	0.718833
								1.64295	1.48862	0.477319			0.134126	0.831445
								1.77707	1.40868				0.178559	0.609055
								0.73312	1.32231	2.17312		0.312665	0.355825	0.683303
								1.44395	1.29802	1.33678		0.663524	0.238449	0.871493
								1.17459	1.40972	1.35296		0.458126		0.717436
								1.27418	1.36959	1.33159		0.568116		0.715593
								1.02281	1.87192	1.33042		0.757796		1.18532
								1.1025	1.21348	1.02781		0.615851		0.535503
									1.72042	1.10074		0.778199		0.420836
								0.559514	1.50077	0.708555		0.566692		0.401577
								0.557956	2.52403	1.10212		0.86792		0.448518
								0.577164	1.47758	0.959166		0.616963		0.475452
								0.711448	1.08672	1.12222		0.553232		0.542064
								0.586038	1.47107	1.50876		0.81886		0.555579
								0.753849	1.03304	1.4134		0.919479		0.583744
								0.790345	0.957569	1.81127		0.669105		0.53707
								0.693937	0.898565	1.23075		0.85354		0.518926
								0.870645	1.20326	1.20967		0.46958
								0.709137	1.10218	0.811757		0.791313
								0.865029		0.748018		0.614468
								0.854676	1.01098	1.23711		1.25704		2.95409
								0.790793	0.869046	0.794227		0.851813		0.226589
								0.882719	1.19958	0.742185		0.479987		0.2546
								0.49388	1.13216	1.10927		0.893554		0.310046
								0.649963	1.30932	0.861554				0.24584
								0.619569	1.83609					0.405967
								0.570504	1.59677					0.333831
								0.686412	1.30479	2.11484		0.298536		0.259503
								0.80981	1.6978	3.19		0.253526		0.376419
								0.976476	2.08546	3.18211		0.239272		0.314797
								0.692537	1.91635	1.33343		0.205255		0.247161
									1.30949	1.70422		0.215719		0.246056
								0.788125	1.45434	1.90782		0.209792		0.313384
								0.942566	1.0669	2.15769		0.269379		0.309296
								0.914113	1.29658	1.77171		0.259841		0.403219
								1.02623	1.01738	2.0902		0.218314		0.388929
								1.25479	1.19831	1.82115		0.210587		0.502792
								1.16438	1.96188	2.70591		0.234656		0.342568
								0.98648	0.985487	2.34255		0.266999		0.586518
								0.952744	2.23812	1.98866		0.279133		0.484971
								1.24222	1.43645			0.201309		0.58026
								1.53371				0.259957
								1.26051	1.30987			0.324554		2.56144
								1.17812	1.30797			0.261349		3.65579
								1.09237	0.84349			0.296513		4.19528
								1.32544	1.02944			0.201669		4.55074
								1.07074	1.09025			0.176348		2.46678
								0.888222	1.03112					0.410782
								1.02605	1.00127					0.985717
								0.987594	0.73913			2.4941		3.09781
								0.898095	0.576002			3.01088		5.60654
								1.06469	0.8875			3.72076		1.99704
								1.04139	0.702863			2.37961		6.46857
								0.848418	0.854235			2.03392		6.63932
								1.2404	0.780804			3.17084		5.89162
								1.16419	0.599675			2.63033		5.31785
								0.90638	0.709433			3.69155
								1.18684	0.853293			2.47964		0.968604
								0.871089	0.778055			3.19575		0.703538
								0.869432	1.20119			2.73319		0.735551
								0.869603	1.11349			2.44228		0.853879
								0.861615	1.0249			1.31613		0.945921
								1.11735	0.868675			2.74263		0.900685
								0.884052	0.723425					1.49934
								0.963114	1.10148					1.64646
								0.833929	0.447791					0.714693
														0.938511
								0.668754						0.670823
								0.955299	1.6968			0.992052		0.873536
								0.85507	1.44663			1.0319		0.995478
								0.702274	1.63034			1.27129		0.828819
								0.882929	1.61886			1.30183		0.780885
								0.629945	1.39134			1.27873		0.791806
								0.775786	1.46189			1.74339		1.12605
								0.760043	1.74321			1.25044		1.1697
								0.896914	2.74884			1.04362
								0.973216	1.45693			1.16175
								0.992183	1.89775			1.09435
								1.18351	1.38662
								0.659094	1.13189
								1.27727	0.964701
								0.524588	1.08139
								0.585259	1.03661			1.00528
								1.14634	1.9558			1.862
								0.800871				1.3012
								0.740181				1.60268
									0.48251			1.3218
								0.449192	0.517104			1.62115
								0.510753	0.62489			1.26218
								0.408974	0.820687			1.51331
								0.286551	0.62873			1.30311
								0.35406	0.67091			1.49555
								0.414453	0.5752			1.54794
								0.399869	0.641168			1.47783
								0.436858	0.544167			2.02216
								0.570616	0.475644
								0.656054	0.548466
								0.418717	0.569168
								0.726519	0.536717
								0.462258	0.643068
								0.36636	0.599329
								0.432171	0.635257			1.62563
								0.419965	0.904098			2.36461
								0.501372	0.915678			0.892794
								0.593349				1.36544
								0.672065				1.4762
								0.519764				1.79183
								0.801579	3.52588			2.80769
								0.516314	3.38222			1.31824
									3.35247			1.9285
									3.6434			2.94764
									4.83102			1.50517
									4.37916			1.2925
								0.476736	3.76478			1.21949
								0.508321	3.27127			1.29492
								0.465691	4.75669
								0.529164	3.36355
								0.463407	3.74691
								0.442349	4.16011
								0.476216	3.56123
								0.38161	4.62752
								0.407916	4.54783
								0.458689
								0.522336
								0.384235
								0.3773	0.807719
								0.435773	0.89551
								0.466332	0.827119
								0.32161	0.810382
								0.307879	0.988407
								0.333922	0.979267
								0.316926	0.827055
									0.732033
									0.725327
									0.852445
									0.879944
									0.918756
									0.831133
								1.02726	0.861944
								1.67738	0.879527
								0.845225
								1.1712
								1.1709
								1.01541
								1.29266
								1.01188	1.0252
								1.56455	1.08356
								1.62781	1.14626
								1.01024	1.39266
								1.66606	1.35471
								1.61959	1.33164
								1.33104	1.45734
								1.0024	1.11707
								1.58179	1.04329
								1.02243	2.59764
								1.04695	1.10484
								1.15192	1.23223
								1.27424	2.11496
								1.50367	2.49529
									2.23195
								0.646916	5.33448
								0.974337	4.23533
								0.684764	3.3015
								0.862499	3.43914
								0.830103	2.31702
								0.642115	3.94139
								0.59478	3.98621
								0.674766	2.75339
								1.24361	3.51724
								0.896601	3.93747
								0.854546	4.60048
								0.627607	3.61417
								0.842896	3.31937
								0.861814	4.14178
								0.660299	3.65341
									2.59798
									3.40836
									2.69396
									3.53469
									3.02278
								1.70126
								1.96563	1.88854
								1.42356	2.04427
								2.08043	1.68057
								1.73694	1.30272
								1.67921	1.81569
								2.33449	1.89961
								1.63182	1.85422
								1.62464	1.62302
								1.50794	1.69942
								2.04285	2.06214
								1.81008	2.09979
								2.08737	2.10751
								1.67932	1.94089
								1.89177	2.12084
								1.64481	1.68611
								1.57185	1.97618
									2.64187
									1.69414
									1.90727
									1.88565
								0.940412	2.4301
								0.991798
								1.22062	1.44636
								1.33252	1.51285
								1.06513	1.72261
								1.09869	1.68135
								0.985672	1.7753
								0.967098	1.62801
								1.14717	1.79737
								1.04038	1.9035
								1.08386	1.61407
								1.01616	1.62624
								1.39934	1.59342
								1.53233	1.54202
									1.47349
									0.817308
									1.47947
								0.592543	0.94847
								0.872515
								1.34556
								1.29402
								1.38526
								1.36311
								1.23229
								1.1648
								1.11366
								1.19288
								1.20721
								1.20743
								1.27155
								1.39286
								1.01834
								1.06242
