# Supplementary material for: Protein Phosphatase 1 inactivates Mps1 to ensure efficient Spindle Assembly Checkpoint silencing
Source: eLife. 2017 May 2;6:e25366. doi: 10.7554/eLife.25366 (PMC5433843; doi:10.7554/eLife.25366)
Supplement: Figure 4—source data 1. — DOI: http://dx.doi.org/10.7554/eLife.25366.023 [file elife-25366-fig4-data1.xlsx]

## Sheet: Source data Figure 4
Figure 4A,B
EGFP-Mps1WT		EGFP-Mps1KAFA		EGFP-Mps1KAFA BubR1 RNAi			Figure 4C	Time (min)	InterKT distance EGFP-Mps1WT
prometaphase	metaphase	prometaphase	metaphase	prometaphase	metaphase			-15																									1.24	1.52	1.38	0.83	1.11
time (min)	time (min)	time (min)	time (min)	time (min)	time (min)			-14																																							1.38	1.39	1.39
210	35	105	90	16	na			-10	1.38	1.54	1.52	1.38								1.11	1.37	1.39			1.51	1.52
21	49	205	75	16				-6																									1.38	1.67	1.78	1.53					1.66	1.38	1.52	1.52	1.52
21	84	100	140	16			1st metaphase frame	0	1.66	1.51	1.8	1.52	1.52	1.52	1.95	1.68	1.93	1.69	2.06	1.94	1.93	1.94	2.07		1.8	2.08	2.63	1.66	1.94	2.08	2	2.07	1.25	1.38	1.39	1.39	1.24	1.39	1.25		1.39	1.52	1.53	1.39	1.68	1.67	1.39	1.25	1.11
21	168	120	135	12				3																									1.12	1.53	1.39	1.52	1.25				1.25	1.39	1.52	1.67	1.52	1.52
		105	155	24				5	1.39	1.38	1.8	1.52	1.8		1.95	1.93	1.94	2.07	1.67	1.94	2.07	1.8	1.8	1.94	2.21	1.93	1.94	2.21
30	80	35	145	20				6
60	10	115	60	28				7																																							1.25	1.39	1.53
30	45	50	125	24				9																									1.53	1.25	1.52	1.25					1.26	1.38	1.24	1.38	1.67	1.37
25	100	25	30	44				10
		55	190					15	1.53	1.65	1.52	1.39	1.39		1.8	1.94	2.21	1.8	1.66	1.52	2.07				1.65	2.08	2.48	1.8	1.67	1.94	2.49	2.2									1.8	1.52	1.66	1.52	1.93	1.67
54	12	10	255	19				21																																							1.66	1.8	2.08
27	81	70	5	19.5				25	1.66	1.67	1.53	1.93	1.66	1.38	1.8	1.65	1.79	2.07	1.66	2.05	2.06				1.94	2.08	1.79	1.94	1.66	1.8
54	30	45	385	12.5				30
12	12	20	295	15				35
78	93			16				40
18	30			12.5				45
32	132			17				50
	33							55
	9							60
								65							2.2	2.35	1.94	2.22	1.52	1.66
								70
								75							2.07	2.22	2.2	2.06
								80
								165
								168
							Figure 4C
								Time (min)	InterKT distance EGFP-Mps1WT
								-15
								-14
								-10	1.52	1.51	1.66	0.83	1.24	1.24	1.65	0.97	0.97		1.1	1.24	1.25	1.24	0.97	1.11	0.96	0.97	1.1		1.52	1.24	1.52	1.11		1.66	1.55				1.67	1.52							1.11	1.52	1.4
								-6
							1st metaphase frame	0	1.66	1.66	1.52	1.79	1.39	1.25	1.79	1.66	1.38		1.39	1.11	1.52	1.39	1.24											1.8	1.39	1.24	1.66	1.39	1.79	1.93			2.21	2.22	2.08	1.99	2.08	2.22	2.09
								3
								5	1.71	1.66	1.38	1.51	1.39	1.24					1.38	1.24	1.25	1.38	1.39	1.11										1.94	1.8	1.52	1.38	1.52	1.39				1.94	2.07	2.21	1.94	1.53	2.22	1.8
								6
								7
								9
								10
								15	1.38	1.53	1.66	1.66	1.39	1.52	1.11				1.52	1.52	1.65	1.41	1.25	1.52	1.13									1.39	1.52	1.94	1.8	1.52	1.66	1.39	1.52		1.8	1.52	1.67	1.94	1.8	1.94	1.51
								21
								25	1.52	1.66	1.91	1.93	1.39	1.93	1.93	1.55			1.52	1.52	1.39	1.52	1.25											2.21	1.94	1.94	1.8	1.67					1.38	1.53	1.66	1.66	1.67	1.67	1.8
								30
								35
								40
								45
								50
								55
								60											1.38	1.52	1.52	1.39	1.67
								65
								70
								75	1.93	2.08	1.93	1.66	1.37	1.79
								80
								85	1.93	1.38	1.66	1.66	2.06	1.65
								90
								95
								100
								105
								110																										2.22	1.8	1.94	1.93	2.07	1.8
								112
								115
								120
								125
								130
								135
								140																																			2.35	2.35	1.65	1.94	2.49	1.52	2.22
								145
								150
								155
								160
								165
								168
								170
								175
								180
								185
								190
								195
								200
								205
								210
								215
								220
								225
								230
								235
								124
								245
								250
								255
								260
								265
								270
								275
								280
								285
								290
								295
								300
[truncated: 24 more columns]
