# Supplementary material for: Protein Phosphatase 1 inactivates Mps1 to ensure efficient Spindle Assembly Checkpoint silencing
Source: eLife. 2017 May 2;6:e25366. doi: 10.7554/eLife.25366 (PMC5433843; doi:10.7554/eLife.25366)
Supplement: Figure 5—source data 1. — DOI: http://dx.doi.org/10.7554/eLife.25366.029 [file elife-25366-fig5-data1.xlsx]

## Sheet: Sheet1
Figure 5A,B			Figure 5C,D
Nucleoplasmic pMps1 absolute values			Time in mitosis (from NEB to AO) in CENP-C RNAi
Control	CENP-C RNAi		Mps1WT	Mps1KAFA	Mps1KAFA+BubR1 RNAi	Mps1KAFA/T490A
122.308	125.365		24	40	44	16
119.156	115.908		28	48	20	24
115.718	80.5528		52	80	16	20
104.22	165.785		24	92	16	28
171.914	67.1033			52	20	28
137.016	80.442		26	128		28
169.466	62.0838		18	36	18	20
129.177	104.84		22	20	18	20
53.143	23.7304		26	20	22	24
62.4639	47.7899		22		22	16
49.9388	54.2439			26	26	28
47.8077	41.0463		30	150	18
126.738	93.1263		25	38	14	39
88.0842	72.3376			26	18	9
93.4331	74.4706			30		15
131.375	76.3605			46		36
76.8215	124.679			22		6
63.1058	94.8549			42		18
76.3151	106.34					24
61.864	93.6739
107.626	136.568
116.428	166.706
99.5932	118.285
101.783	157.457
118.014	138.426
141.131	96.399
153.496	97.203
124.993	106.759
138.843	92.4917
129.353	92.9985
156.007	100.024
136.723	112.102
124.686	99.8606
137.438	83.3574
126.593	97.315
137.189	115.319
149.526	135.476
124.149	124.034
124.487	131.757
100.719	118.527
59.8146
59.4094
58.6403
46.6768
73.804
64.7122
71.6243
69.7731
61.8632
71.6561
75.4641
69.2972
67.1203
45.132
64.4048
109.33
85.7973
100.165
92.1294
104.409
