# Supplementary material for: Protein Phosphatase 1 inactivates Mps1 to ensure efficient Spindle Assembly Checkpoint silencing
Source: eLife. 2017 May 2;6:e25366. doi: 10.7554/eLife.25366 (PMC5433843; doi:10.7554/eLife.25366)
Supplement: Figure 6—source data 1. — DOI: http://dx.doi.org/10.7554/eLife.25366.036 [file elife-25366-fig6-data1.xlsx]

## Sheet: Source data Figure 6
Figure 6A,B			Figure 6C,D				Figure 6E,F				Figure 6G,H
PP1-87B/Spc105			PP1-87B/Spc105				pMps1/CID				EGFP-CyclinB Integrated density normalized for value at NEB
Unaligned	Aligned		Control	Binuceline2			Control	RO 3306	RO 3306+PP187 RNAi			Time (min)	Cell1	2	3	4	5
0.691723	0.834875		0.35759	1.02732			1.1747	0.309841	0.578119		NEB	0	100	100	100	100	100
0.689741	1.02013		0.304569	0.907034			1.48332	0.236393	0.718396			0.5	100.004	102.927	118.786	99.7903	99.7091
0.573277	0.824427		0.333866	0.802597			1.24692	0.365843	0.729878			1	100.97	102.001	105.23	101.973	97.2655
0.578756	0.843549		0.398932	0.780115			1.26583	0.322695	0.538321			1.5	97.515	101.371	103.615	102.299	95.6107
0.642393	0.89689		0.316716	0.630187			1.00834	0.374913	0.80965			2	96.3358	101.19	109.001	98.6784	96.0451
0.585723	0.860729		0.361408	0.559617			1.58118	0.272458	0.516599			2.5	93.4233	100.649	106.636	96.5847	96.6886
0.601008	0.923762		0.354667	0.619979			1.29591	0.304376	0.600173			3	93.2281	98.1924	106.822	98.8705	94.7196
0.640419	0.934202		0.31804	0.557209			1.45606	0.336387	0.579978			3.5	92.5945	96.8491	104.921	103.064	95.0253
0.645539	1.00309		0.366185	0.56939			1.92552	0.376679	0.648114			4	91.1785	97.495	105.67	100.35	94.3105
0.613819	0.805736		0.32547	0.729716			1.33003	0.407057	0.662721			4.5	89.0865	96.8283	104.299	105.561	95.3052
0.637806	0.88775		0.316276	0.527632			1.48204	0.333033	0.843711			5	90.9791	96.661	102.525	99.4748	94.7283
0.604719	0.94993		0.357738	0.500942			1.30014	0.337541	0.619098			5.5	90.9786	97.7202	102.44	96.3088	93.7495
0.585864	0.851882		0.272939	0.760074			1.18841	0.391508	0.820029			6	90.7064	97.104	102.206	95.5824	94.1783
0.569675	0.734475		0.312884	0.807082			3.64714	0.337969	1.17121			6.5	90.3248	95.9903	101.313	102.056	92.8447
0.578142	0.934095		0.333333	0.724686			3.05068	0.440889				7	89.1214	95.272	101.425	100.905	93.0372
0.662288	0.801736		0.273636	0.67701			1.94374	3.23259				7.5	91.759	95.8619	103.54	94.8823	93.3695
0.624216	0.842366			0.573934			3.49337	0.266125	0.858754			8	90.6176	96.0907	103.875	96.6574	91.8803
0.591078	0.975228			0.597212			1.36143	0.358004	1.11427			8.5	91.8816	96.7422	102.717	95.9993	92.8845
0.683193	0.746865			0.557855			1.03923	1.34831	0.790962			9	93.8212	96.6744	97.7307	98.0252	93.6191
0.59263	0.796135			0.495417			1.32325	0.654024	0.981241			9.5	91.7928	95.0925	98.3247	96.0054	91.0813
0.556195				0.591628			1.18313	0.212868	1.20309			10	91.6752	93.9372	97.2933	92.1897	90.2262
0.662485				0.701445			1.03553		1.13807			10.5	91.2151	91.4659	100.218	93.5713	90.6667
0.597523	0.90007			0.590765			1.08771		0.868507			11	91.2769	92.1631	99.3343	91.2255	90.0665
0.662202	0.953312		0.37941	0.502643			1.06511		1.37532			11.5	90.3626	92.6026	99.79	89.0241	90.0794
0.569271	0.962014		0.44353	0.624993			1.08313		0.885287			12	89.7432	92.2542	98.8296	88.5833	88.021
0.580801	0.939385		0.474809	0.546304			0.968716		1.98633			12.5	89.1867	90.4933	97.5051	89.5184	89.2661
	1.02885		0.458558						0.957586			13	89.4456	90.6602	98.575	91.3021	88.249
	1.15645		0.302189						0.941049			13.5	88.0982	88.4915	102.062	88.3957	89.5167
0.572706	0.898614		0.335872					0.342343	1.99144			14	88.6841	89.5853	97.8516	111.397	87.9438
0.695698	0.946053		0.456218					0.349592	1.07192			14.5	88.7298	88.7897	93.0029	90.1247	88.7273
0.499942	0.968774		0.746907					0.320991	1.4			15	88.0373	87.8875	99.2414	93.2275	89.8992
0.632331	1.10014		0.536336					0.364124	1.22765			15.5	89.1395	86.8159	98.6759	82.4241	89.9021
0.596387	1.04831		0.459491					0.280895	1.45218			16	87.3783	86.3109	94.6911	88.7786	89.2137
0.621322	1.18107		0.374643	0.780902			0.818691	0.30424	1.33375			16.5	84.6232	85.2875	94.4408	88.9914	88.0755
0.684308	0.986927		0.305064	0.714286			1.03671	0.308947	1.61031			17	85.2039	85.647	94.8588	87.9316	87.594
0.653133	0.852828		0.31848	0.746224			0.888986	0.374174	1.28125			17.5	82.1162	83.1455	93.4316	86.3325	86.7276
0.425863	0.945805		0.379601	0.759333			1.17239	0.386421	1.60415			18	83.4126	82.9501	90.6734	87.2049	87.2289
0.430763	1.01601		0.397307	0.884154			0.946741	0.350676				18.5	81.693	81.8088	92.1992	87.6162	87.8021
0.514411	0.924507		0.400978	0.531004			1.21726	0.343846				19	81.0924	81.8758	92.8598	83.2193	85.9827
0.537839	1.06378		0.295023	0.84948			1.61556	0.279757	1.10085			19.5	80.5671	80.6365	95.7901	84.0926	87.0609
0.595688	0.87354		0.325016	0.71678			1.5459	0.348138	0.579549			20	80.3546	79.0565	91.1746	82.7872	87.2137
0.620523	0.863488		0.3953	0.618867			0.814592	0.303186	0.800926			20.5	84.2836	77.857	88.1753	80.6753	86.5588
0.61857	1.32418		0.450935	0.6609			1.33619	0.389167	0.695361			21	81.6278	78.8134	88.3074	79.4364	84.0022
0.53135	0.879273		0.373245	0.779422			1.25868	0.308517	0.819063			21.5	79.7836	77.7068	90.242	84.5432	85.9532
0.589266	1.02399		0.586408	0.551229			0.853576	0.340951	0.52333			22	79.2537	75.872	86.305	77.3119	85.6806
0.617413	1.00035			0.629667			0.799722	0.374528	0.582279			22.5	79.1338	76.2908	88.4248	75.3595	83.9035
0.569706				0.668618			0.930098	0.340778	0.807556			23	78.343	76.364	90.2703	75.4468	82.8272
0.590415				0.820617			1.05793	0.291769	0.598106			23.5	76.9927	76.8305	87.012	81.0327	82.835
	0.732607			0.635841			1.21466	0.345651	0.687026			24	77.8523	74.9282	88.1176	80.6481	82.2105
	0.747897			0.623926				0.300724	0.46803			24.5	75.9842	73.8337	87.4003	78.6405	81.9452
0.557338	0.817953			0.748074				0.239955	1.15472			25	78.0622	73.0711	89.8359	78.2349	82.0265
0.546627	0.818639			0.769323				0.229581	1.07053			25.5	74.7591	72.3415	87.4039	78.2076	82.1822
0.509926	0.678836		0.566284	0.87989					0.624655			26	75.9544	70.5091	87.0733	76.8832	81.5748
0.622906	0.806008		0.734664	0.818441			1.09924		0.511057			26.5	73.235	70.979	84.3082	76.4616	81.8207
0.518233	0.729901		0.409372	0.724644			1.13525		0.448602			27	72.5662	67.2036	86.0175	77.9834	81.6485
0.566701	0.82444		0.55084	0.597762			0.960441		0.464383			27.5	71.8644	64.3143	87.711	73.9208	82.832
0.639235	0.796443		0.460339	0.580429			1.18188	0.276609	0.51397			28	69.6443	63.2862	82.9702	76.1154	81.615
0.665911	0.808007		0.378106	0.636029			1.09946	0.238998	0.514844			28.5	71.1525	61.7438	84.3852	73.2186	80.3886
0.596053	0.752701		0.51285	0.851169			1.24676	0.257361	1.35003			29	69.2941	60.4748	82.3764	68.5069	81.3615
0.54745	0.816194		0.548757	0.755224			1.24412	0.277565	1.51888			29.5	68.5843	57.7808	79.953	71.1089	80.9378
0.540011	0.877424		0.939728				0.870246	0.341645	0.725259			30	66.2707	54.4896	80.4623	72.9043	80.699
0.550558	0.743698		0.668078				1.45404	0.301016	1.00062			30.5	65.9457	51.0045	83.4155	69.5508	78.9937
0.518903	0.849361		0.519156				2.72454	0.307252	1.70884		Metaphase	31	65.9091	46.3729	83.722	66.6354	78.8302
0.595392	0.824141		0.349965				1.0969	0.2503	1.65984		(mean time)	31.5	64.3896	42.8806	79.6105	69.9945	77.7584
0.603458	0.785803		0.400317				1.15924	0.322299	1.27664			32	62.5814	38.8764	79.7902	71.9878	76.5653
0.591994	0.732049		0.408936				1.79446	0.353866				32.5	65.3088	34.5546	78.1594	68.1498	78.1
0.601511			0.497827				1.44197	0.290638				33	61.3651	29.051	75.5589	61.1662	77.4368
0.69273			0.424916	0.501872			0.945027	0.229299				33.5	60.2629	25.4419	74.0752	62.6013	77.6402
0.628729			0.371702	0.689588			1.69224	0.326674				34	59.1997	21.5783	72.6333	67.4238	77.4477
0.591633			0.427818	0.487235			1.1597	0.421567	0.74933			34.5	56.755	17.642	71.9208	63.7775	77.2317
0.703038			0.427411	0.489338			1.21199		1.02289			35	54.9851	13.3017	68.641	64.7572	75.7346
	0.542192		0.4731	0.529843			1.12249		1.22442			35.5	53.7999	9.53968	66.5659	66.0049	76.2719
	0.457473		0.446212	0.80058			1.86729		1.15381			36	52.7609	8.15677	61.1324	65.6256	77.0568
0.541782	0.551697		0.436142	0.777873			2.19164		0.778195			36.5	50.9881	5.72236	61.6877	61.7673	76.7335
0.405592	0.489681		0.376691	0.876126			2.21227		0.879789			37	49.5094	4.97397	57.519	66.6947	75.4021
0.505449	0.521015		0.421348	0.81			0.883787		1.36095			37.5	47.9622	4.45906	52.375	62.0635	74.5823
0.531712	0.586344		0.421561	0.649829			1.11272		0.799564			38	44.9685	3.04851	48.3402	55.2154	73.3926
0.520245	0.647533			0.599773			2.61694		1.1804			38.5	44.5693	2.02236	46.043	53.8392	73.9201
0.523841	0.640467			0.652333			1.29558		0.850108			39	41.7438	1.71995	43.5314	64.3544	73.259
0.574224	0.569831			0.950288					1.79253			39.5	40.1164	1.10252	57.2444	61.0096	74.2562
0.569796	0.593595			0.762024				0.266101	1.43489			40	38.8628	1.14266	55.8104	61.8252	72.8467
0.640622	0.540669			0.555979				0.309811	1.0386			40.5	37.746	0.764794	48.0594	56.5818	73.5627
0.631405	0.554028			0.75356			0.0663024	0.280195	1.35701			41	34.4155	0.645298	43.8456	55.2454	74.1275
0.638708	0.637078			0.601958			0.784955	0.278899	1.50096			41.5	32.3786	0.435321	38.8019	56.6771	73.3702
0.610452	0.609887		0.330254	0.556701			0.893682	0.352909	1.20917			42	28.0324	0.459748	35.7365	50.4732	74.3031
0.525526			0.284034	0.590311			1.07585	0.233747	1.56548			42.5	26.7324	0.111009	31.9834	45.9249	72.4758
0.553058			0.268722	0.566637			0.721349	0.262633	1.19617		AO	43	23.3002	0.294495	23.6647	40.8139	73.0044
0.634714	0.729778		0.282037	0.5598			1.81205	0.23768	0.868122		(mean time)	43.5	22.4315	0	22.3949	39.7698	72.2949
0.569712	0.728295		0.29531	0.627252			1.07328	0.286528	1.62568			44	18.4755	1.49679	21.9377	35.0897	71.7557
0.544128	0.762103		0.31264	0.598328			1.15921	0.269634				44.5	16.8052	0.454358	20.3143	24.8701	70.5976
0.517828	0.869614		0.430005	0.61799			2.6558	0.245599				45	14.3613	1.06525	11.0498	25.6701	69.8611
0.526078	0.869024		0.395631	0.566532			1.15902	0.263541				45.5	10.7844	0.797821	11.3115	24.1724	67.7615
0.526019	0.711739		0.343501				0.889027	0.259892	0.528413			46	9.33252	0.657798	8.30109	19.205	67.293
0.517241	0.781202		0.38964				1.92316	0.287438	0.269718			46.5	6.94933	0.921789	8.37865	16.9914	65.8799
0.540274	0.838328		0.370198				1.04874	0.298484	0.436966			47	7.52006	1.42534	7.10687	15.9939	65.1229
	0.808446		0.343851				1.63565	0.228598	0.360445			47.5	4.97016		4.23025	16.9523	63.0585
	0.76513		0.425779				1.0869	0.285883	0.392206			48	3.9346		8.49094	10.8651	63.1525
0.567954	0.805097		0.418015				0.934441	0.27754	0.45316			48.5	4.11605		8.30256	8.25355	61.8245
0.521372	1.0327		0.3649				1.32863	0.572552	0.512553			49	1.20451		5.94841	7.81872	62.1426
0.594821	0.726304		0.458006				0.717864	0.70755	0.362894			49.5	3.11386		3.99776	6.74621	58.4099
0.575011	0.81067		0.435024	0.622467			0.737056	0.306253	0.367128			50	1.59694		3.74992	8.20081	57.1243
0.523426	0.904657		0.366945	0.636768			0.867494	0.482731	0.650103			50.5	0.358497		4.21706	5.37109	56.2535
0.448046	0.795451		0.294582	0.389619			1.37794	0.284023	0.85553			51	0.960577		0	7.31045	54.3976
0.494484	0.89266		0.299243	0.462323			1.67445		1.15484			51.5	0		3.29311	0	52.1698
0.535238	0.961126		0.316577	0.328218			0.867656		0.291988			52	0		0		50.9521
0.484895	0.876934		0.304283	0.387196			1.1356		1.10602			52.5	0.023318		0		48.0391
0.58898	0.818093		0.374275	0.321216					0.760038			53	0		0		44.6056
0.583117			0.329181	0.449876					0.780266			53.5			0		42.1597
0.643771			0.305551	0.477264				0.16831	0.820048			54			0		40.037
0.481243	0.753059		0.387463	0.606057				0.197662	0.682874			54.5			0		38.9711
0.714881	0.835665		0.383889	0.800549				0.218985	0.792599
0.568217	0.794512		0.334773	0.760188			1.66003	0.177931	0.532553
0.47018	0.853311		0.316533	0.59041			1.62692	0.23403	0.557261
0.618616	0.867372		0.367308	0.546376			1.00527	0.158684	0.526768
0.625629	0.838126		0.374524	0.456853			0.850204	0.185569	0.640911
	1.05562		0.373018	0.677605			1.55054	0.244882	0.545654
	0.908273		0.355152	0.454802			0.885355	0.292444	0.444657
0.587272	0.976051		0.350503	0.576836			1.20989	0.215191	0.347443
0.509046	0.938422		0.436521	0.687421			0.881545	0.213669	0.496609
0.479496	0.847364		0.444444	0.551843			1.01419	0.197394	2.76041
0.558552	0.939264		0.36343	0.527353			1.42582	0.241553	1.4541
0.635366	0.955043		0.322492	0.502074			1.38247	0.191504
0.669745	1.0065		0.260532	0.456211			0.95732	0.237669
0.570654			0.326484	0.630627			1.36035	0.241472	0.532713
0.430129			0.424485				0.947961	0.182905	0.789919
0.648399			0.323861				1.47217	0.221818	0.55488
0.541707			0.476807				1.5201	0.173069	0.389486
0.579215			0.399038				1.45286	0.532537	0.489318
0.770543			0.380068				2.08493	0.741509	0.248679
0.589852			0.32458				1.46014	0.160421	0.450766
0.528837			0.235033				1.2606	0.248672	0.453186
0.509854			0.33828	0.487807			1.03286	0.216605	0.275128
0.489351			0.321574	0.400307			1.39629	0.288107	0.513166
0.526066			0.34126	0.544402			1.63737	0.264207	0.499743
0.562506			0.439808	0.609283			1.29557	0.210083	0.462129
0.577254				0.795346			1.25945	0.16774	0.442564
0.536416				0.57502				0.153375	0.454867
0.591453				0.432605				0.168431
0.586519				0.396393				0.226515
				0.483675			1.55065	0.163309
				0.475886			1.32834	0.209176	0.666573
0.527697				0.555198			1.05563	0.149606	1.34249
0.616791			0.293976	0.550729			1.01812	0.228696	1.42013
0.498841			0.324304	0.377987			1.20559	0.22166	0.743104
0.532133			0.33198	0.432151			1.19146	0.185525	0.702208
0.478339			0.299913	0.483994			1.26201	0.138146	1.12667
0.498631			0.379879	0.420029			1.32626	0.303434	0.851791
0.600262			0.397666	0.402564			1.19287	0.265558	1.00835
0.491508			0.313434	0.474391			0.991817	0.219238	1.57187
0.562028			0.301168	0.695241			1.14513	0.166091	1.08293
0.679621			0.291804	0.516145			0.836187	0.207315	1.56074
0.579825			0.369922	0.454212			1.01233	0.251651	1.66767
0.633978			0.268479	0.445699			1.13958	0.198205	1.24168
0.604498			0.343041	0.454391			1.21977	0.21035	0.922213
0.684277			0.376372	0.533949			1.33678
0.631176			0.427514	0.427835			1.15698
0.593968			0.380435				1.09243	0.319941
0.54925			0.305072				1.10579	0.327892	1.18512
0.629392			0.316215				1.08892	0.346047	0.802894
0.61871			0.37346				1.18156	0.202094	0.579442
0.56953			0.351263				1.73078	0.382522	0.930236
0.619855			0.562613	0.674705			1.29083	0.280692	0.703422
0.602385			0.383205	0.793922			1.11814	0.380229	1.03388
			0.438662	0.618182			1.18981	0.281275	1.11186
			0.324719	0.720664				0.281751	1.92283
0.459754			0.261316	0.53771				0.184019	1.16716
0.557102			0.407085	0.5874			0.928978	0.294142	0.639229
0.473662			0.333997	0.667479			1.02273	0.285493	1.12416
0.43283			0.332975	0.760049			0.905747	0.28873	0.781784
0.502577			0.303389	0.648262			2.13506	0.393001	1.19139
0.495542			0.326415	0.899831			3.52131	0.291715	1.04645
0.544154			0.379406	0.776488			0.814942	0.344384	0.645059
0.486431			0.430027	1.17596			1.19624	0.279392	0.867923
0.582316			0.350199	0.698351			0.866173	0.387542	1.20011
0.520328			0.382504	0.860598			0.928486	0.283719	2.50445
0.638085			0.459802	1.18214			0.808661	0.462708	1.39816
0.630554			0.464508	1.73522			1.02011	0.475177	1.45844
0.612956			0.31848	1.24061			1.34688		1.02131
0.536774			0.331044				0.860248		0.9136
0.567362			0.322485				0.946276		0.871769
0.453773			0.3527	0.651664			1.36289		0.75996
0.494336			0.260459	0.510821			0.937263
0.538322			0.298678	0.721337			0.886895
0.543287			0.3529	0.737634			1.00358	0.359524
0.573396			0.356789	0.663943			0.785715	0.510094
0.52282			0.37678	0.604068			1.0496	0.336782
0.680145			0.336016	0.606753			1.11095	0.356132
0.498554			0.333912	0.598847			1.31078	0.481876
0.5652			0.34163	0.58641			1.40205	0.377115	0.331942
			0.304188	0.731988				0.552462	0.340482
			0.308753	0.700207				1.72793	0.402588
0.547955			0.377028	0.690734				0.645114	0.507164
0.593456			0.378714	0.672923				0.342482	1.64557
0.543637			0.389648	0.566327			0.991385	0.973478	0.610323
0.653687			0.348574				1.25457	0.410867	0.679107
0.544377			0.433619				0.975152	0.334877	0.309524
0.5408			0.297708	0.536574			1.03701	0.372942	0.27861
0.555786			0.302487	0.555538			1.14283	0.336532	0.302343
0.547108			0.379705	0.665544			0.686207	0.498356	0.370055
0.657035			0.375841	0.835362			0.921414	0.323324	0.472935
0.542511			0.413043	0.658893			1.14622	0.409947	0.396731
0.621778			0.305647	0.652853			0.618181	0.313739	0.324119
0.600573			0.261914	0.677145			1.55406		0.378619
0.566902			0.465377	0.681507			0.844256		1.26387
0.600159			0.405242	0.550269			2.13808		2.18527
0.520491			0.354342	0.723767			1.04814	0.257201	0.401203
0.578921			0.37614	0.667729			1.11686	0.318411	0.496428
0.616247			0.326471	0.565367			1.71661	0.365341	0.48437
0.561474			0.265624	0.641965			2.54436	0.285749	0.319762
0.591234			0.468	0.667182			0.98486	0.269246	0.355506
0.569896			0.3397	0.644832			0.987479	0.288701	0.40138
			0.324411	0.728391			1.27265	0.516711	0.379436
0.278593			0.319053	0.950179			0.869316	0.244104	0.454442
0.371529			0.344273				1.22775	0.249212	0.456779
0.330559			0.292628				2.23309	0.317109
0.346172			0.381366				1.20332	0.326896
0.335542			0.347253				1.28116	0.420455
0.336097			0.366438				0.974943	0.369668	0.137646
0.352776			0.281214				0.972113	0.265722	1.56146
0.30597			0.3259				1.48596	0.294805	0.812586
0.364651			0.292321				4.19593	0.337931	0.251274
0.370532			0.316415				1.20584	0.305505	0.513626
0.319679			0.295997				1.13813	0.268276	0.439285
0.360537			0.325701				0.738952		0.606834
			0.314385				0.577162		0.223025
			0.269543					0.280646	0.282586
0.472042			0.348496					0.334346	0.220353
0.552399			0.454474				1.29875	0.364669	0.200449
0.520072			0.304064				2.11549	0.412012	0.178892
0.576972			0.339073				1.11546	0.350164	0.512954
0.5305			0.402603				1.19747	0.403003	0.335792
0.486158			0.436203				1.34048	0.392994	0.397506
0.606182			0.41578				1.13227	0.453997	0.366001
0.427188			0.381003				0.853592	0.409805	0.441458
0.477041			0.374349				1.24065	1.66977	0.325016
0.461394			0.291506				1.16971	0.902177	0.386132
0.591318			0.405942				1.46208	0.441665	0.304857
0.483203			0.285568				1.88988	0.401179	0.26404
0.46104			0.437035				1.02856	0.447921	0.228576
0.553648							0.914789	0.495104	0.292922
0.533639							1.18051	0.287762	0.29075
0.44431							1.16696	0.920648	0.237848
0.479306							1.24064	0.405523	0.16249
0.515258								0.393429	0.259303
0.473182								0.366688	0.228693
0.533477								0.461027	0.231332
			0.276945					0.436271	0.169385
			0.203622					0.441738	0.198012
0.506125			0.253364					0.515899	0.343969
0.539058			0.283913						0.151173
0.506989			0.245808						0.199961
0.536543			0.354831
0.564568			0.279458				0.907636
0.477242			0.254433	0.417892			0.909135	0.229222
0.608808			0.234897	0.401135			0.999874	0.330942
0.51445			0.231817	0.390335			0.834242	0.289124
0.624523			0.290835	0.457743			1.16045	0.332263	0.428925
0.555853			0.255402	0.485636			1.14418	0.568881	0.370946
0.768059			0.353141	0.34662			1.21801	0.54665	0.48752
0.578164			0.29789	0.349325			1.17357	0.49447	0.430226
0.458497			0.30986	0.510386			0.94326	0.419389	0.355305
0.441155			0.316712	0.533031			0.888125	0.762642	0.429083
			0.298949	0.448757			0.940397	0.431792	0.332001
			0.25171	0.346595			0.998629	0.816389	0.473819
			0.286679	0.364767			0.915125	0.751914	0.50995
			0.315424	0.432971			1.07072	0.356431	0.221401
			0.295807	0.388889			0.997961	0.281813	0.286788
			0.273575	0.519879			0.943881	0.38777	0.40153
			0.284225	0.533023			0.895319	0.316478	0.414355
			0.265156	0.431788			1.05441	0.369745	0.415983
			0.2148	0.384084			1.1648	0.321637	0.346582
			0.229252	0.535486			1.56206	0.312911	0.462993
			0.190476				1.08858	0.28835	0.422241
			0.265029				3.06214	0.334769	0.307946
			0.184823	0.401271			1.29187	0.484756	0.386021
			0.199446	0.477966					0.503284
				0.391843				0.301996	2.99005
				0.443118				0.286824	0.306756
				0.403417				0.283901	0.324393
				0.412305				0.445528	0.256575
				0.513699				0.25923	0.23512
				0.450825				0.543143	0.397855
				0.541808				0.423439	0.452314
			0.226153	0.461316				0.330384	0.453614
			0.245322	0.462815				0.403454	0.435248
			0.351132	0.393486				0.315277	0.591389
			0.256184	0.351844				0.306366
			0.292192	0.52812				0.239836
			0.284971	0.480478				0.29525	0.606812
			0.240903	0.324287				0.379399	1.51415
			0.28549	0.343915				0.376129	1.21571
			0.490992	0.387917				0.455331	0.505662
			0.491707	0.400459				0.350176	0.392037
			0.317848	0.584092				0.437562	0.674206
			0.35722					0.483242	0.45394
			0.236453						5.45884
			0.307372						0.9161
			0.203607					0.306378	2.25626
			0.237479					0.37735	1.20778
			0.460248	0.574987				0.379348	1.78436
			0.332586	0.942049				0.472975	0.905483
			0.219646	0.64				0.414559	0.693082
			0.223455	0.57219				0.553837	0.794285
			0.28714	0.551738				0.936313	0.467763
			0.247323	0.564661				0.404381	0.412488
			0.198484	0.554709				0.41014	0.485629
			0.346771	0.54294				0.371814	0.556591
			0.543023	0.397471				0.505854	0.448002
			0.350321	0.388871				0.612242	0.354163
			0.202492	0.477228				0.457139	0.525075
			0.368989	0.456099				0.508674
			0.433877	0.535616				0.462039
			0.354676	0.696078				0.558569
			0.43689	0.410907				0.569026
			0.450034	0.529281				0.389746
			0.527737	0.686969				0.458498
			0.204557	0.601736				0.454339
			0.212362	0.452034				0.511057
			0.278366	0.418647
			0.211699	0.420881
			0.22973	0.530135
			0.242865	0.372869
			0.276218	0.393967
			0.359897	0.439315
			0.331434	0.395062
			0.291538	0.350132
			0.256989	0.322709
			0.37284	0.468831
			0.332791	0.525671
			0.208784	0.57131
			0.250544	0.468633
			0.32973	0.744632
			0.277733	0.734997
			0.350428	0.459322
			0.244163	0.532602
				0.607918
				0.468071
				0.434351
				0.39576
				0.671161
				0.589627
				0.623528
			0.211569	0.597752
			0.251594	0.418555
			0.240827	0.550885
			0.203793	0.512947
			0.221052	0.590564
			0.282155	0.672948
			0.226496
			0.212525
			0.25717	0.781749
			0.183183	0.709486
			0.15523	0.687079
			0.232355	0.559763
			0.30111	0.695584
			0.235096	0.680106
			0.245938	0.570334
			0.244074	0.610947
			0.27104	0.602309
			0.231403	0.489412
			0.475741	0.480952
			0.495794	0.476856
			0.336448	0.456719
			0.468942	0.440149
			0.266569	0.478912
			0.290214	0.408742
			0.233403	0.441807
			0.217647	0.518467
				0.543072
			0.311197
			0.274812
			0.352039
			0.223072
			0.238253
			0.282151
			0.329218
			0.240678
			0.310775
			0.257135
			0.265907
			0.249457
			0.300276
			0.298644
			0.190103
			0.236923
			0.234713
			0.26078
			0.24483
			0.204002
			0.225104
			0.21702
			0.225048
			0.210651
			0.255039
			0.222126
